# Supplementary material for: Mechanism of self/nonself-discrimination in Brassica self-incompatibility
Source: PubMed Central journal article supplement (PMC7530648; doi:10.1038/s41467-020-18698-w), 2020-10-01
Supplement: 41467_2020_18698_MOESM1_ESM.pdf [file 41467_2020_18698_MOESM1_ESM.pdf]

## Supplementary Materials

### **Mechanism of self/nonsel-discrimination in *Brassica* self-incompatibility**

Murase *et al.*

Supplementary Figures 1–11  
Supplementary Table 1  
Supplementary References

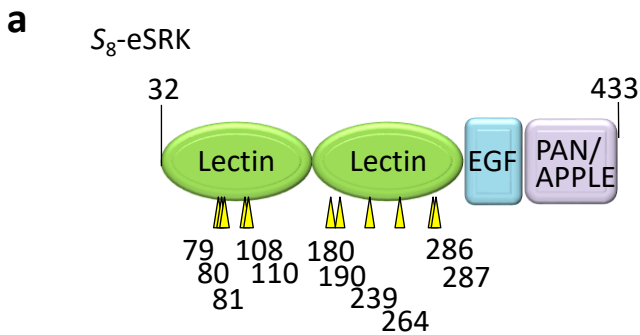

Mutations

m1: P79S, Y80E, I81R

m2: F108V, L110R

m3: F159S

m4: L180R

m5: F190S

m6: L239S

m7: L214Q

m8: I228N

m9: F264S

m10: V286G, V287A

**b**

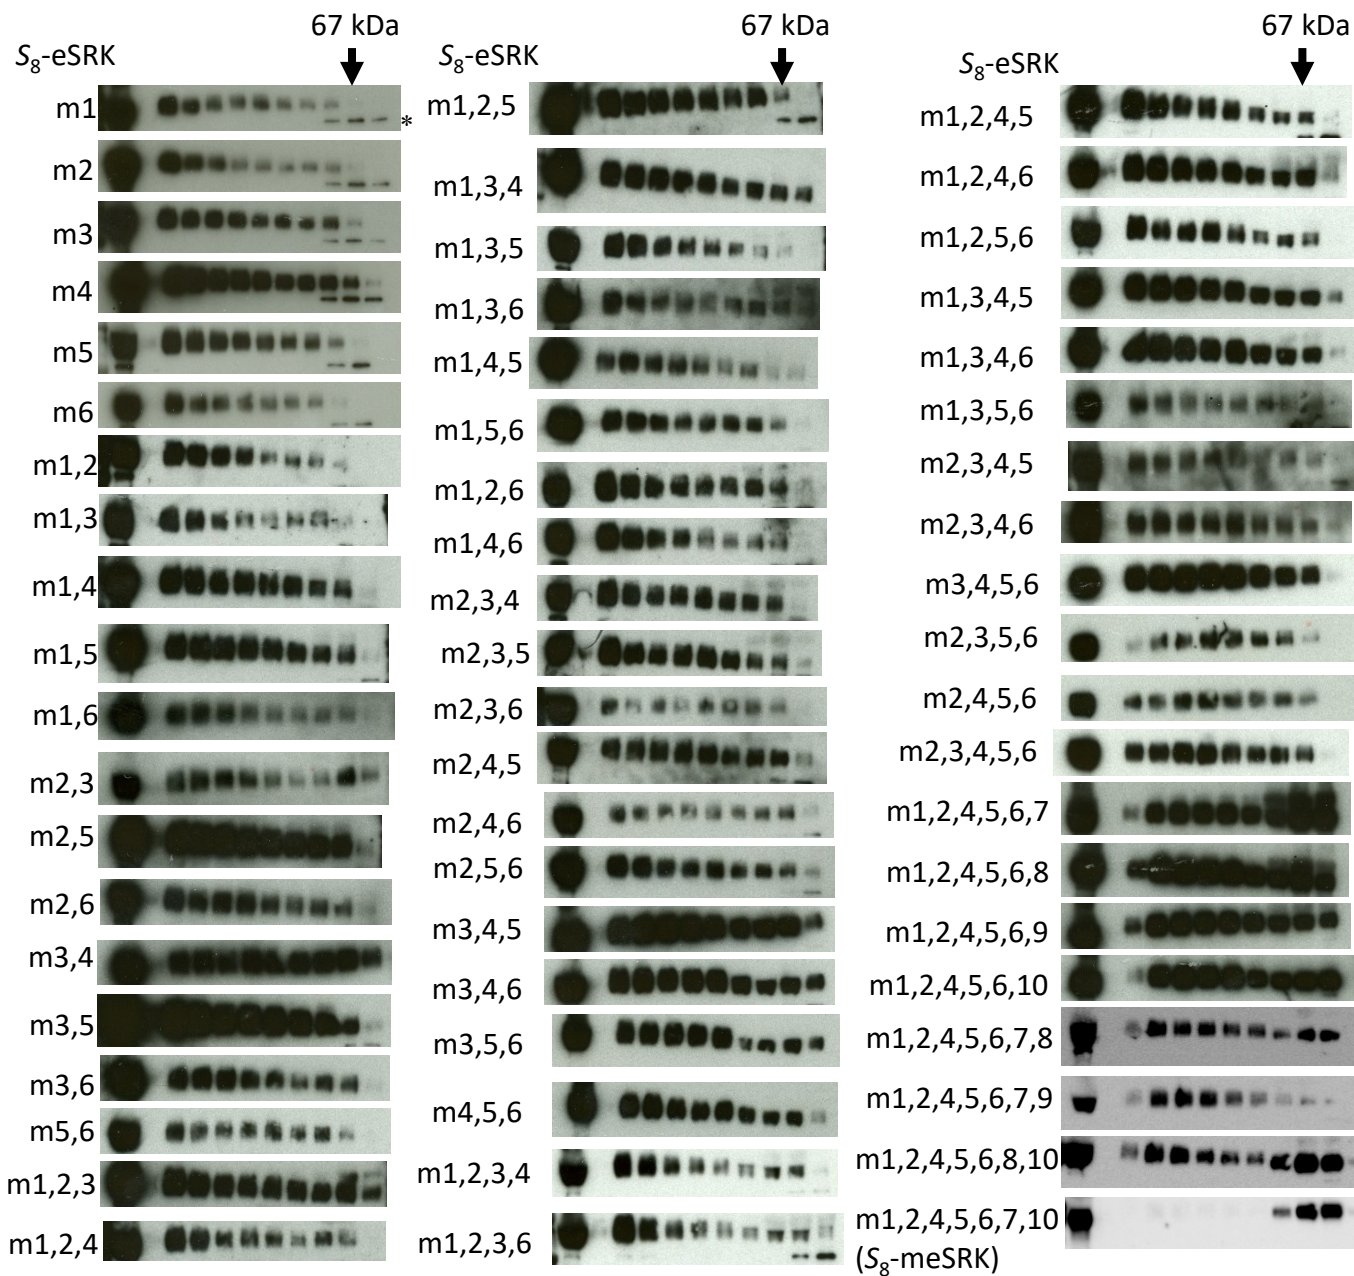

Supplementary Fig. 1

**c**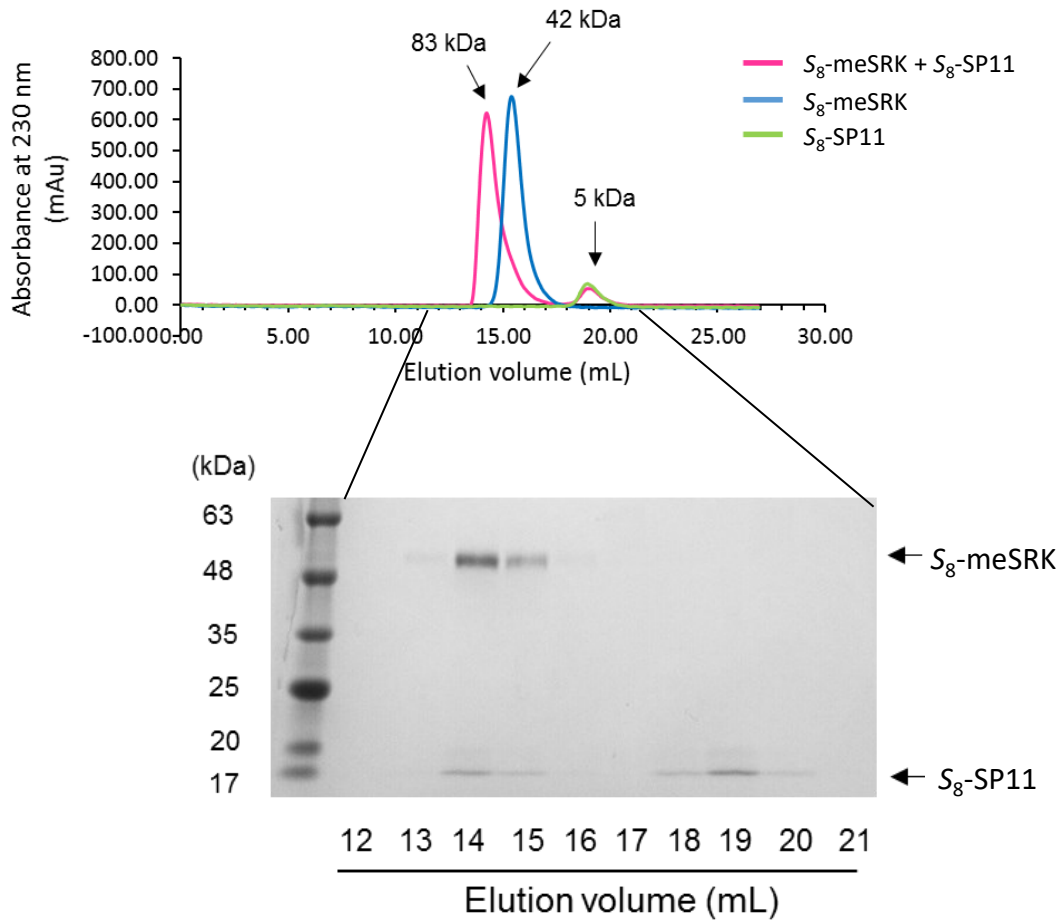**d**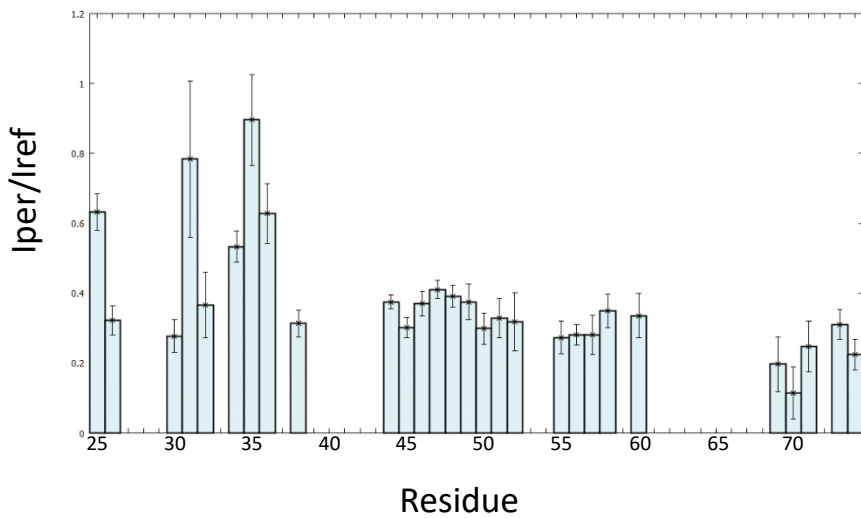**e**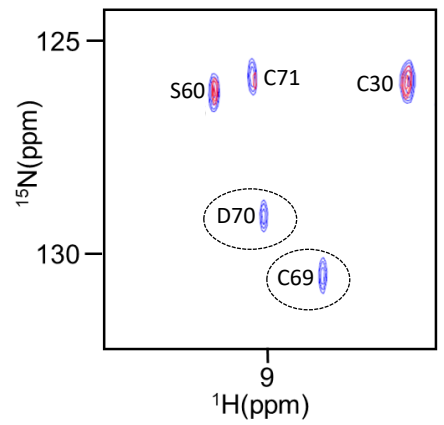

Supplementary Fig. 1

**Supplementary Fig. 1  $S_8$ -meSRK expression and recognition of  $S_8$ -SP11.** **a**, Left, schematic diagram of  $S_8$ -eSRK constructs. Arrowheads show the positions of mutations used in  $S_8$ -meSRK. Right, list of mutations used for screening of  $S_8$ -eSRK expression shown in **b**. **b**, Screening of  $S_8$ -eSRK constructs for stable overexpression in Sf9 cells. Numbers in the construct names indicate that the constructs have the corresponding mutations listed in **a**. Asterisk shows non-specific bands. **c**, Gel-filtration analysis of  $S_8$ -meSRK,  $S_8$ -SP11, and  $S_8$ -meSRK- $S_8$ -SP11 proteins using a calibrated Superdex 200 column. Upper panel shows the merged chromatogram of the samples. Arrows show the calculated molecular size of each peak. Lower panel shows a Coomassie blue-stained SDS-PAGE gel of the separated fractions from chromatography of  $S_8$ -meSRK- $S_8$ -SP11 proteins. **d**, Chemical shift perturbation analysis of  $S_8$ -SP11. The signal intensities of the  $^1\text{H}$ - $^{15}\text{N}$  HSQC spectrum of  $S_8$ -SP11 were reduced upon addition of unlabeled  $S_8$ -meSRK. Signal reduction versus amino acid residue is shown for  $S_8$ -SP11. The data are represented by the intensity ratio  $I_{\text{per}}/I_{\text{ref}}$ ;  $I_{\text{per}}$  and  $I_{\text{ref}}$  were measured in the presence and absence of  $S_8$ -meSRK, respectively. The error bars were calculated based on the signal-to-noise ratios. **e**, Selected region of overlay of 2D  $^1\text{H}$ - $^{15}\text{N}$  HSQC spectra of the  $^{15}\text{N}$ -labeled  $S_8$ -SP11 in the presence (red) and absence (blue) of  $S_8$ -meSRK. The representative drastically perturbed (i.e., reduced) signals are marked by dotted circles. The  $S_8$ -SP11 and  $S_8$ -meSRK concentrations were 70  $\mu\text{M}$  and 35  $\mu\text{M}$ , respectively. The spectra were recorded at 900 MHz at the  $^1\text{H}$  frequency.

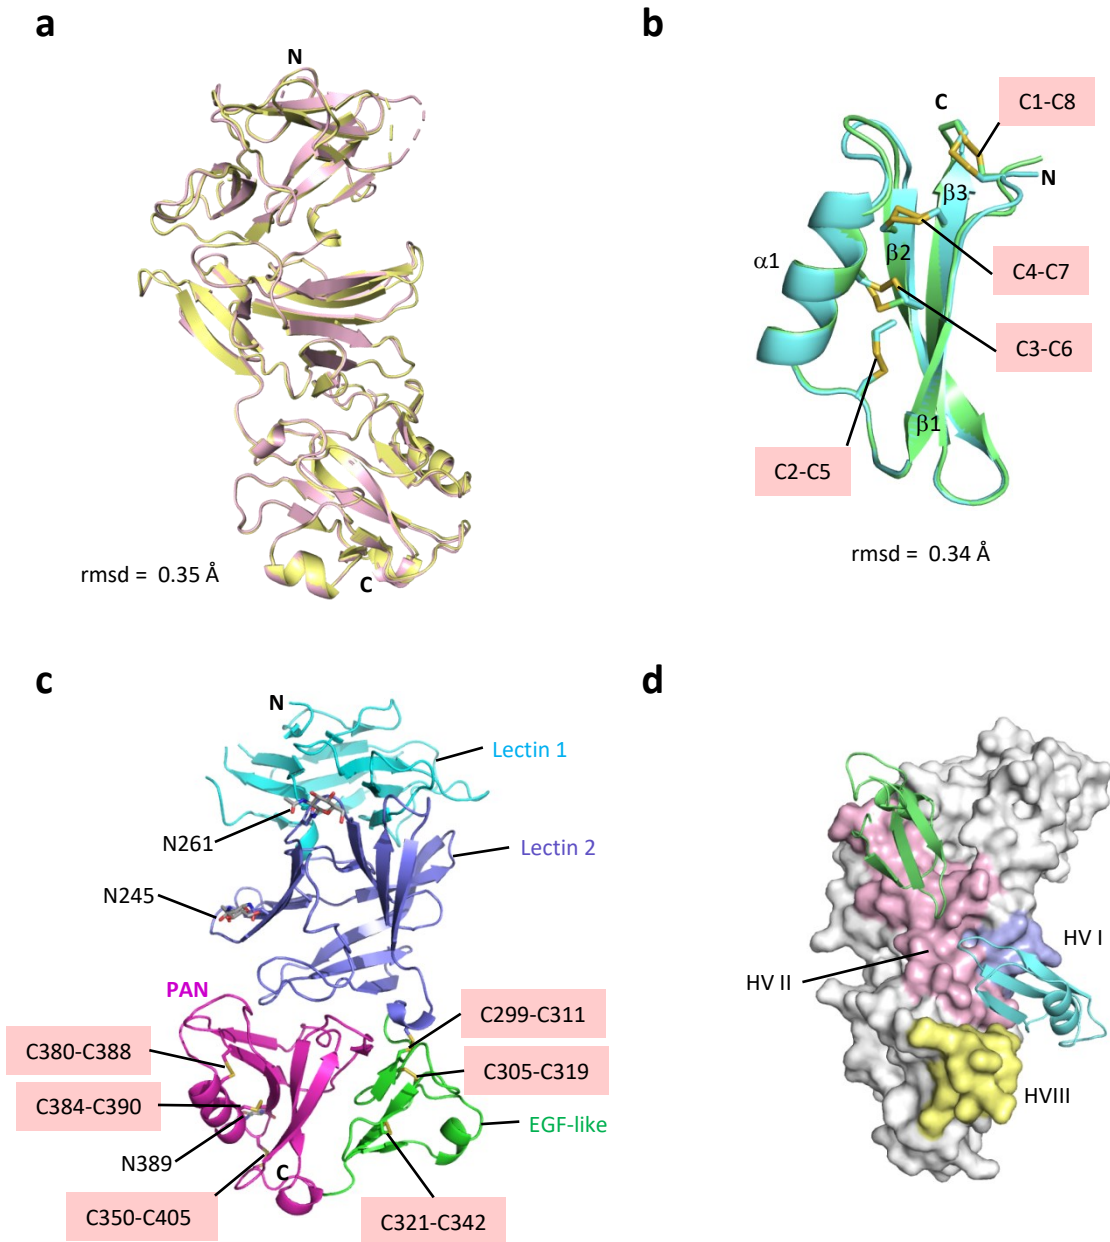

**Supplementary Fig. 2 Structural features of  $S_8$ -meSRK- $S_8$ -SP11 complex.** **a**, Superimposition of the two  $S_8$ -meSRK molecules in the heterotetramer of  $S_8$ -meSRK- $S_8$ -SP11, colored in pink and yellow. Dashed lines show disordered regions. **b**, Superimposition of two  $S_8$ -SP11 molecules in the heterotetramer of  $S_8$ -meSRK- $S_8$ -SP11, colored in cyan and green. Eight cysteine side chains forming disulfide bonds are represented by stick models. **c**, Domain organization of  $S_8$ -meSRK. Lectin 1, Lectin 2, EGF-like, and PAN domains are colored in cyan, purple, green, and magenta, respectively. Cysteines forming disulfide bonds and sugar chains are represented as stick models. **d**, HV regions forms an SP11 binding surface on  $S_8$ -meSRK. HV regions are shown in purple (HV I), salmon pink (HV II), and yellow (HV III).  $S_8$ -SP11 molecules are colored in cyan and green.

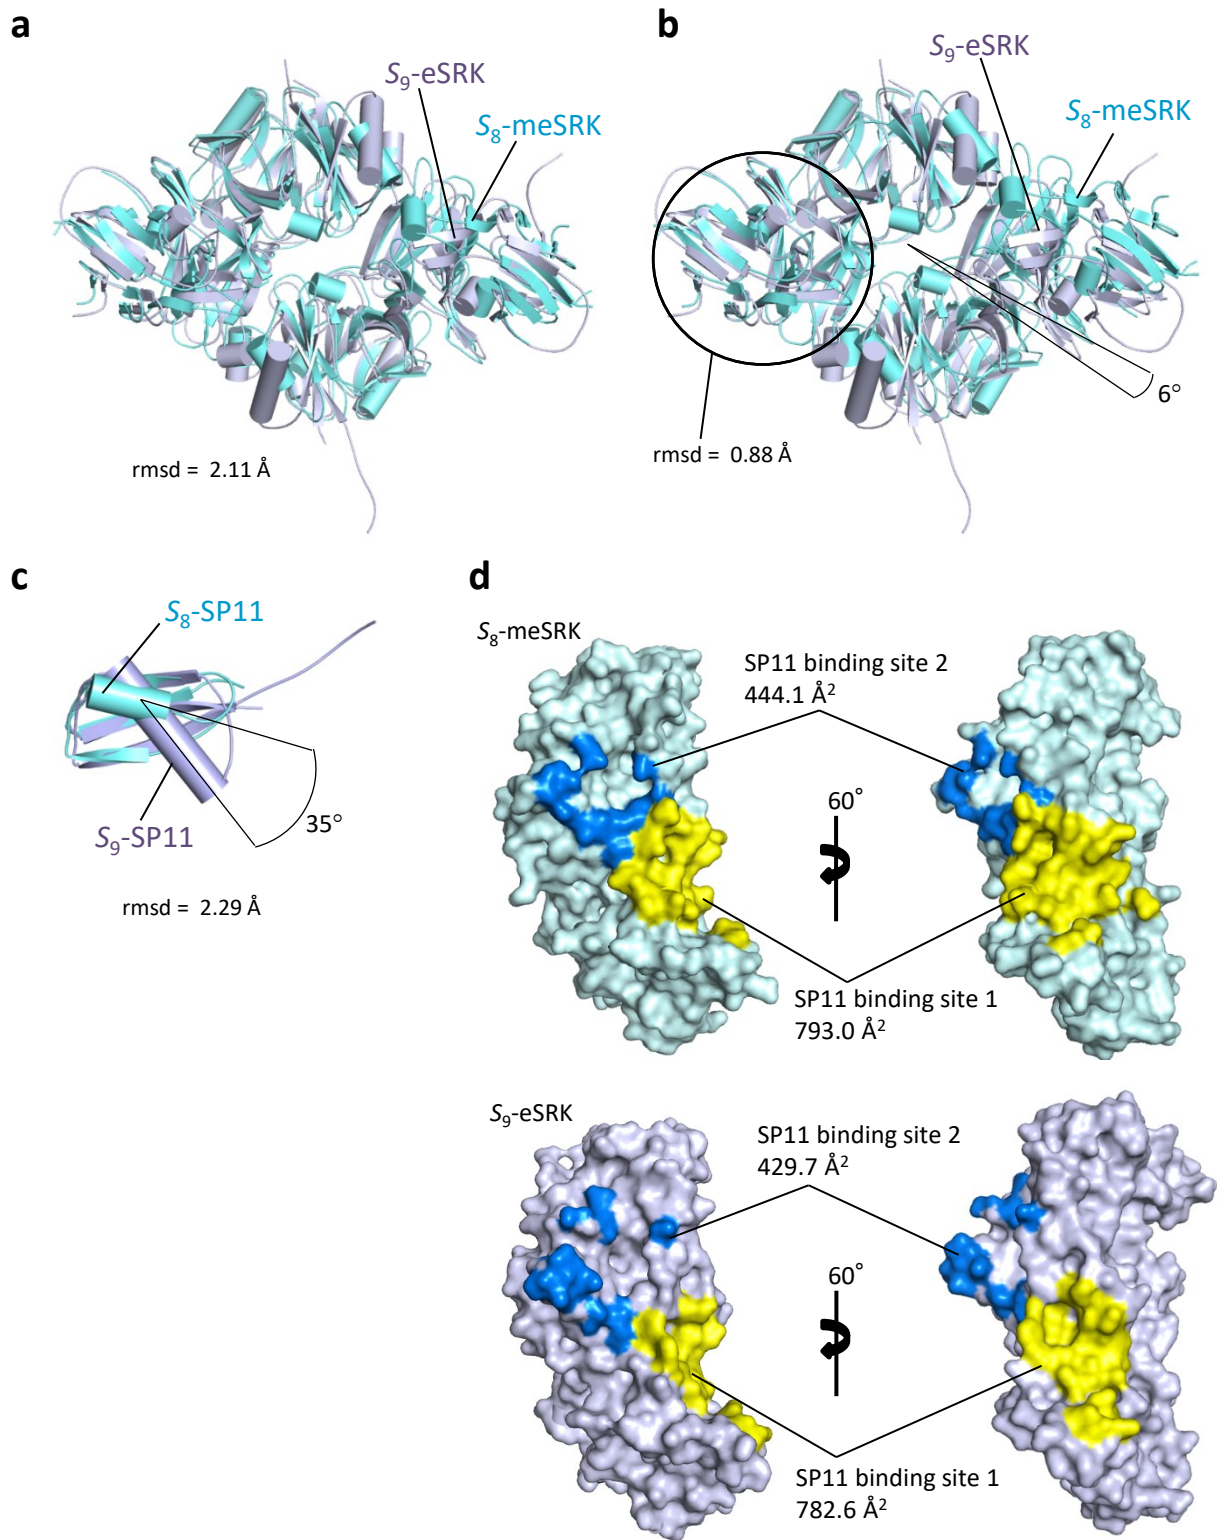

Supplementary Fig. 3



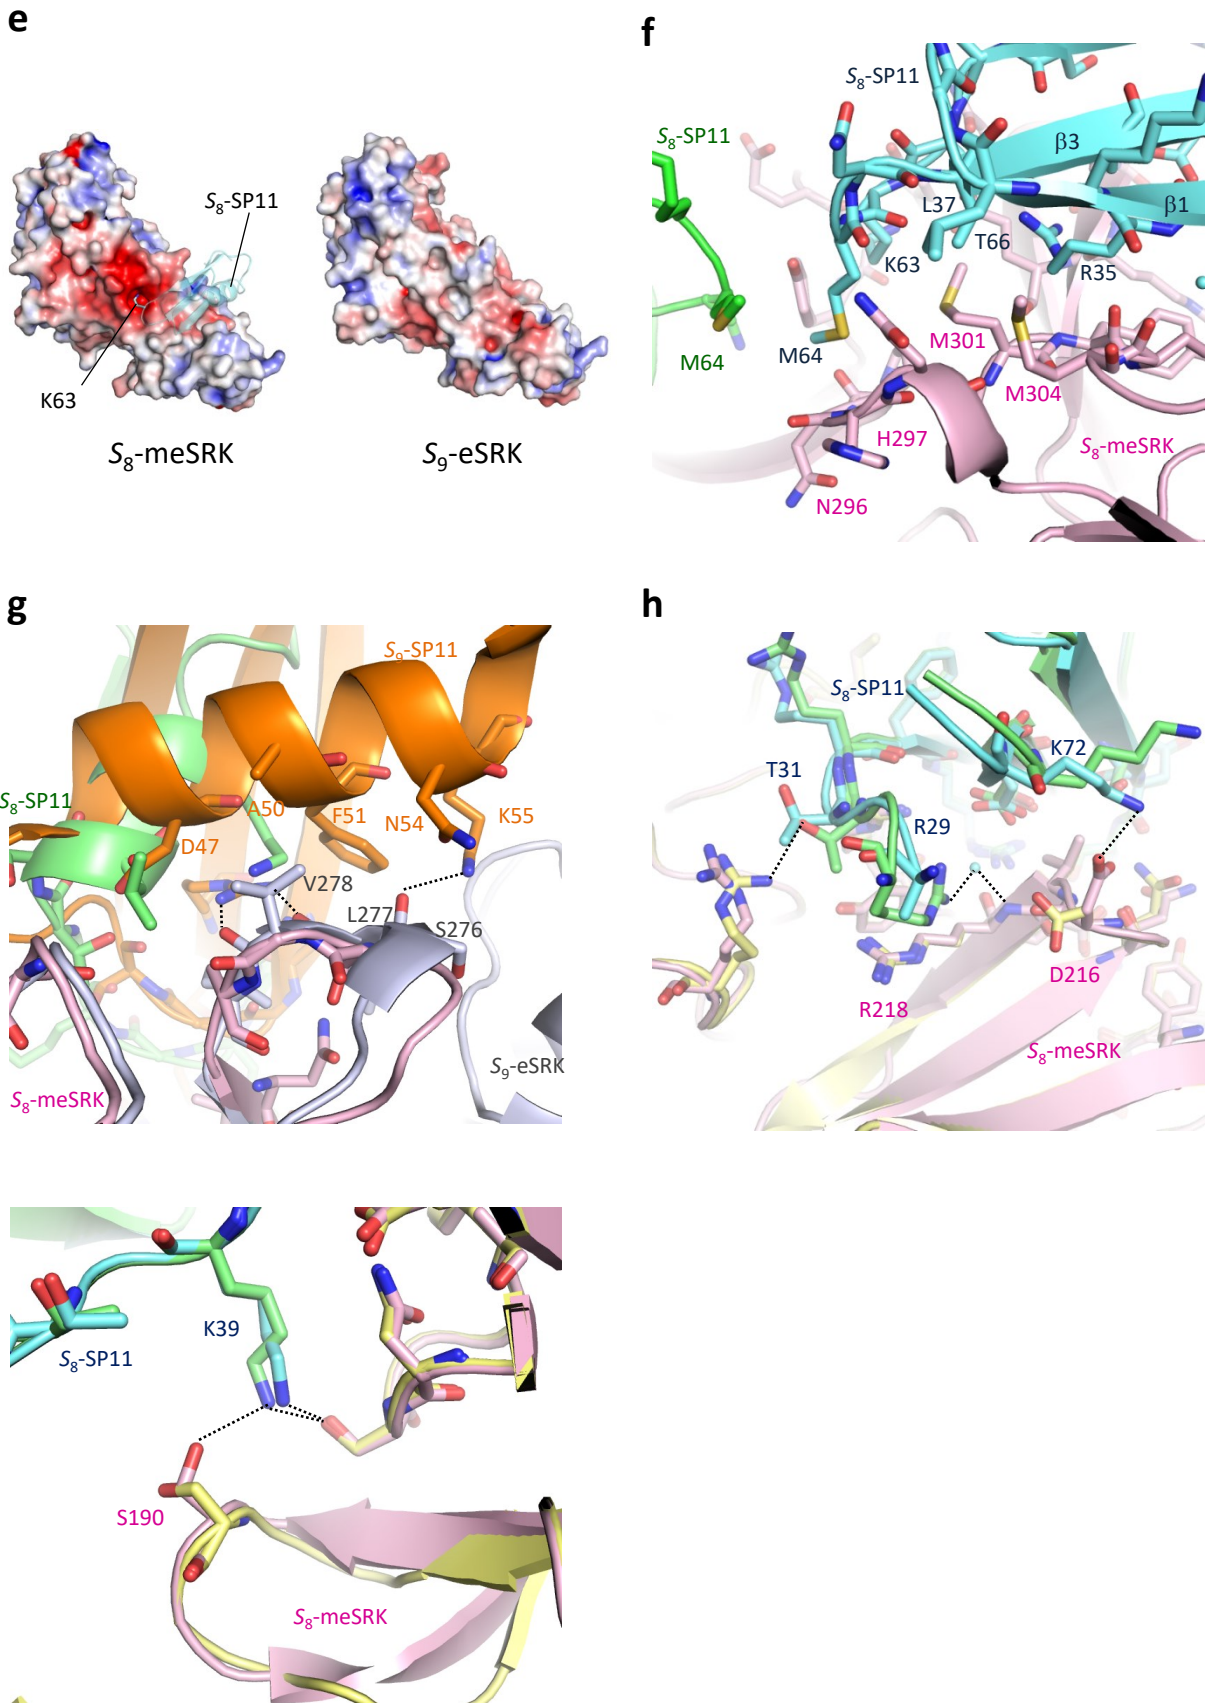

Supplementary Fig. 3

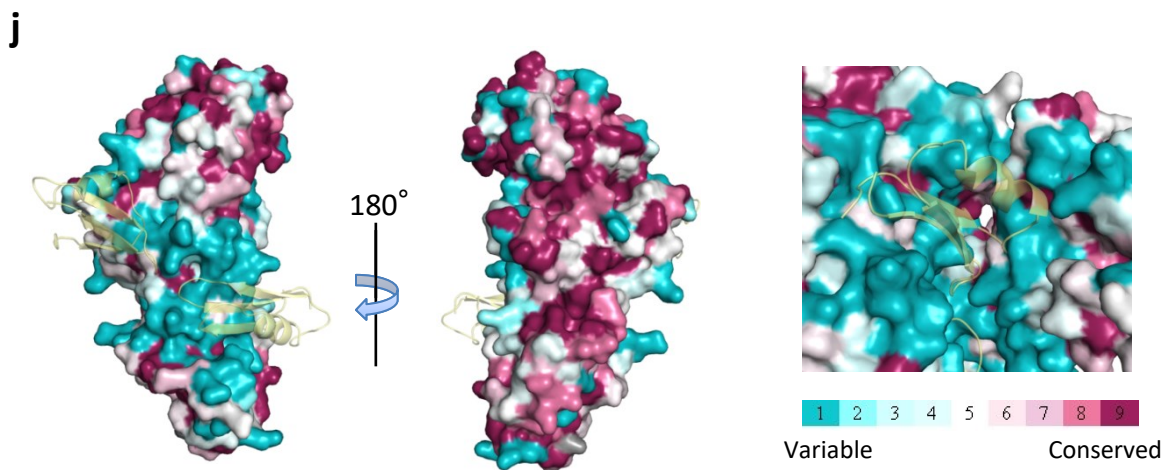

**Supplementary Fig. 3 Comparison of  $S_8$ -meSRK- $S_8$ -SP11 and  $S_9$ -eSRK- $S_9$ -SP11 complexes.** **a, b**,  $S_8$ -meSRK- $S_8$ -SP11 (cyan) and  $S_9$ -eSRK- $S_9$ -SP11 (purple) complexes are superimposed using  $C_\alpha$  atoms of whole complexes (a) and single eSRK molecules (b). eSRK molecules used for superimposition are enclosed by a circle. **c**,  $S_8$ -SP11 (cyan) is superimposed on  $S_9$ -SP11 (purple). **d**, Molecular surfaces of  $S_8$ -meSRK (cyan) and  $S_9$ -eSRK (purple). SP11 binding sites 1 and 2 are colored in yellow and blue, respectively. **e**, Electrostatic potential surfaces of  $S_8$ -meSRK (left) and  $S_9$ -eSRK (right).  $S_8$ -SP11 is shown in cyan. **f**, Close-up view of the center of the  $S_8$ -meSRK- $S_8$ -SP11 complex.  $S_8$ -meSRK is shown in pink, and  $S_8$ -SP11 molecules in cyan and green. **g**, Close-up view of HV III regions of  $S_8$ -meSRK (pink) and  $S_9$ -eSRK (silver).  $S_8$ -SP11 and  $S_9$ -SP11 are shown in green and orange, respectively. **h, i**, Differences in ligand-receptor interaction between the two heterodimers in the  $S_8$ -meSRK- $S_8$ -SP11 complex. The heterodimers are superimposed based on the  $C_\alpha$  atoms of each  $S_8$ -meSRK.  $S_8$ -meSRK- $S_8$ -SP11 pairs are shown in pink-cyan and yellow-green, respectively. The side chain of Arg29 in  $S_8$ -SP11, shown in cyan, is disordered. **g-i**, Dotted lines represent hydrogen bonds. Water molecules are shown in small cyan spheres. **j**, Conservation profile of *Brassica* eSRK proteins. Conservation scores, calculated with the ConSurf program using 30 *B. rapa* SRK sequences, are shown in color on the molecular surface of  $S_8$ -meSRK.  $S_8$ -SP11 molecules are shown in yellow.



**a**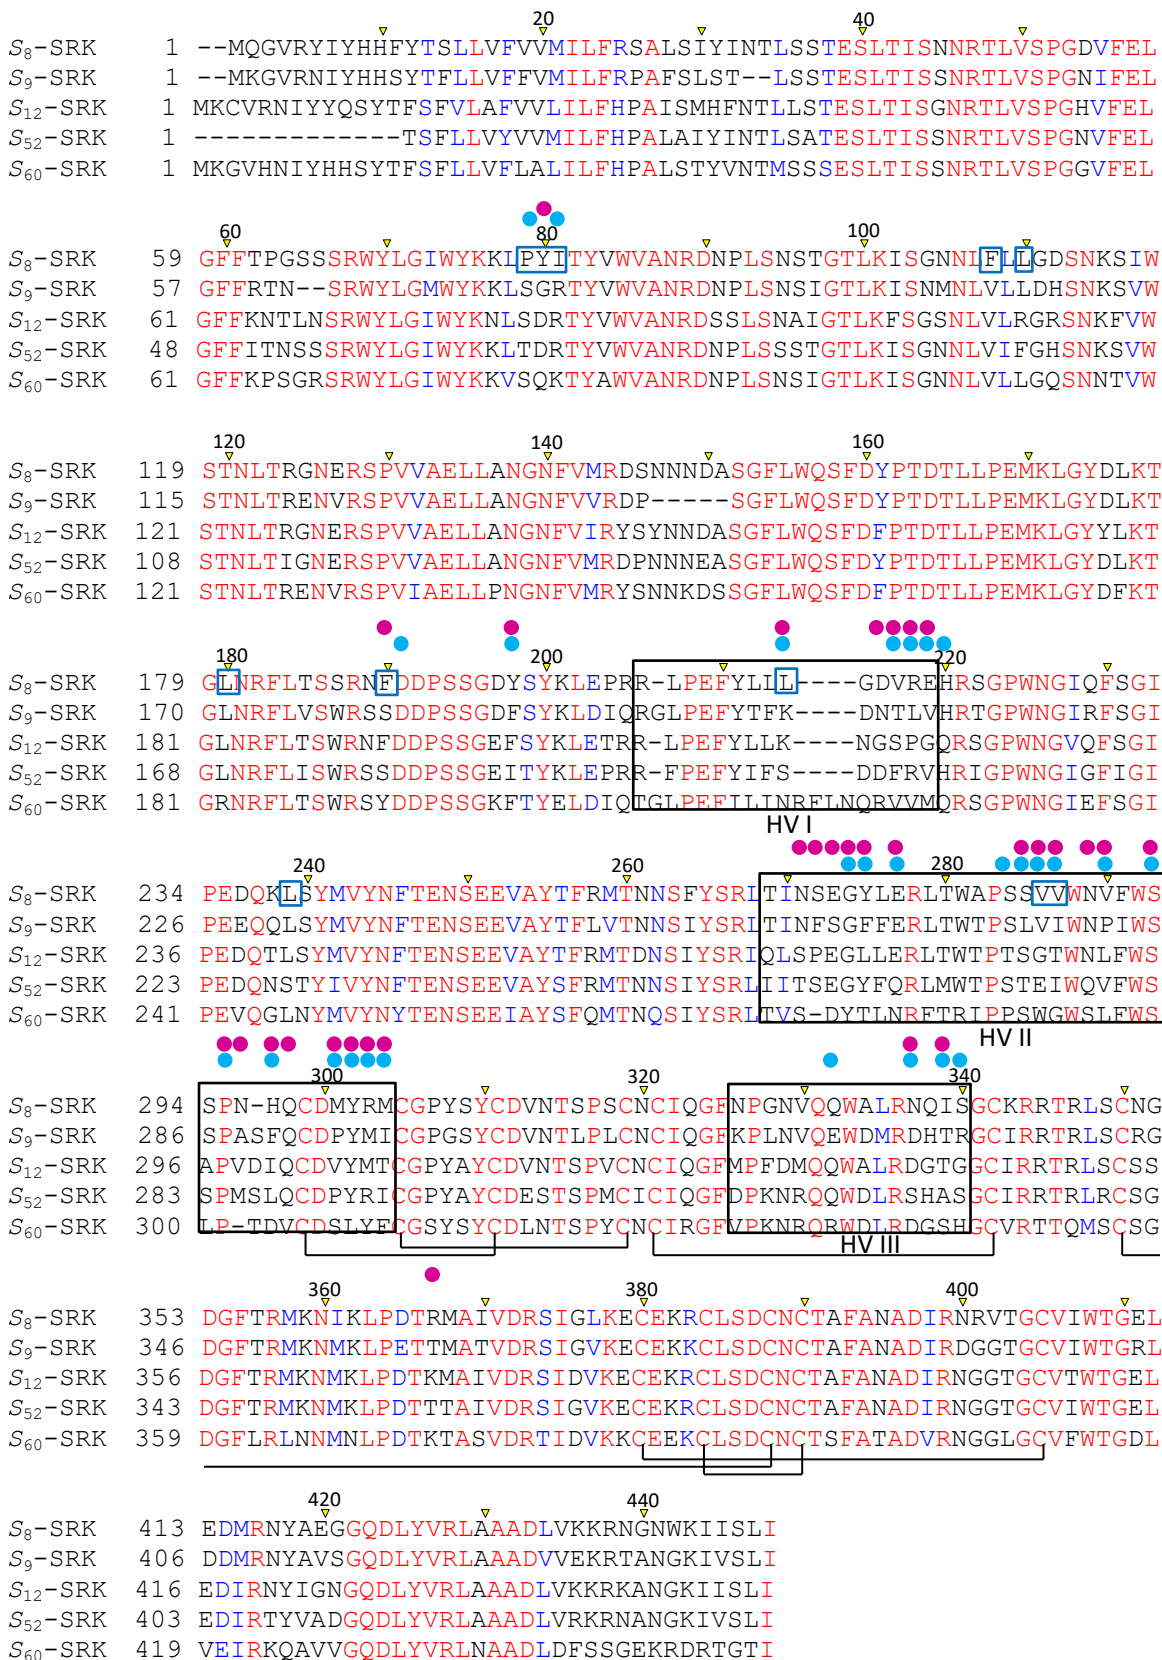

Supplementary Fig. 4

**b**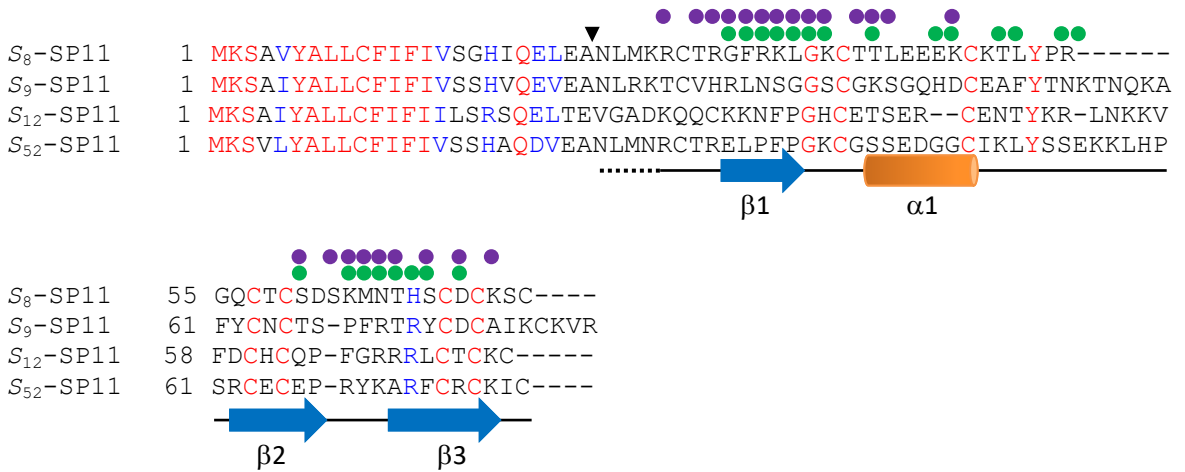

**Supplementary Fig. 4 Sequence alignments of *Brassica* SRK and SP11. a**, Sequence alignment of *B. rapa* SRK ectodomains. Contact amino acids against the cognate SP11 are shown as magenta ( $S_8$ ) and cyan ( $S_9$ ) circles. The black boxes indicate three HV regions. Cysteine residues forming disulfide bonds are connected by lines. Yellow arrowheads and upper numbers show the positions of  $S_8$ -SRK. The positions of the 11 amino acid mutations in  $S_8$ -meSRK are indicated by blue boxes. **b**, Sequence alignment of *B. rapa* SP11 proteins. Amino acids contacting with eSRK are shown by purple ( $S_8$ ) and green ( $S_9$ ) circles. Arrowhead shows the endpoint of the signal peptide. Arrows and cylinder indicate the  $\beta$ -strands and  $\alpha$ -helix of  $S_8$ -SP11, respectively. Dotted line shows the disordered region in the crystal structure of the  $S_8$ -meSRK- $S_8$ -SP11 complex.

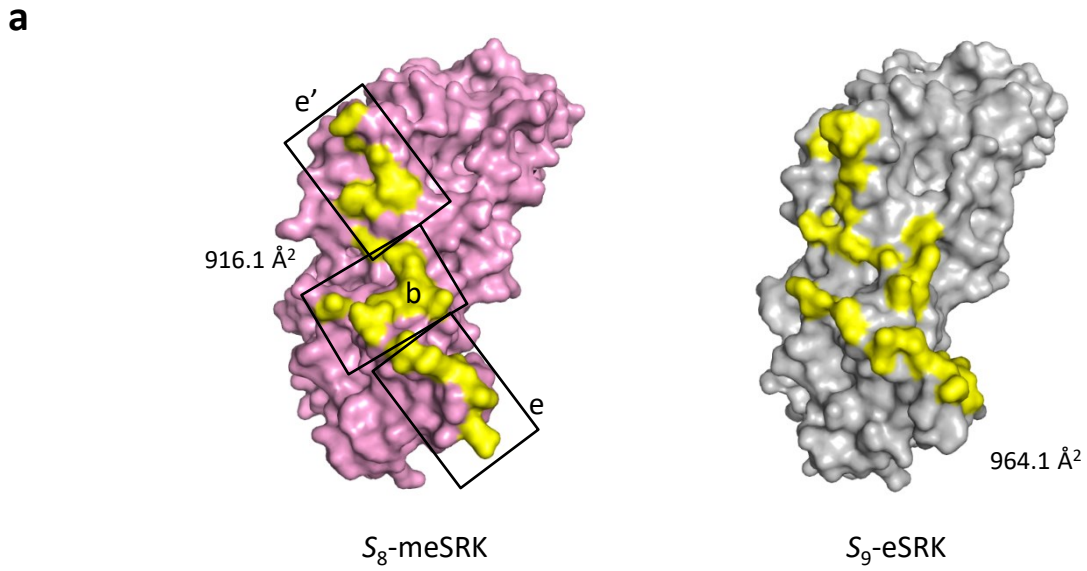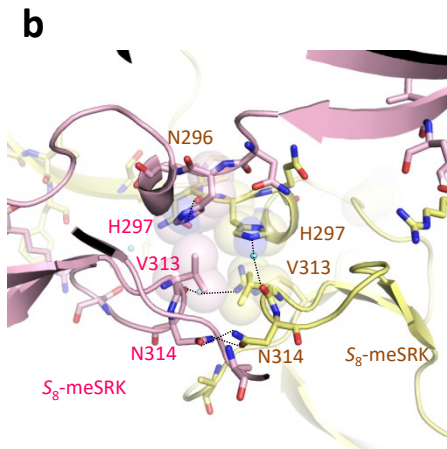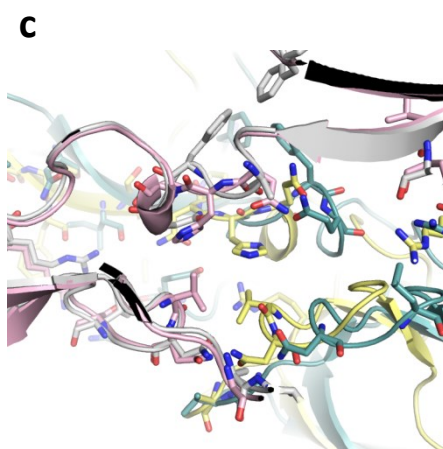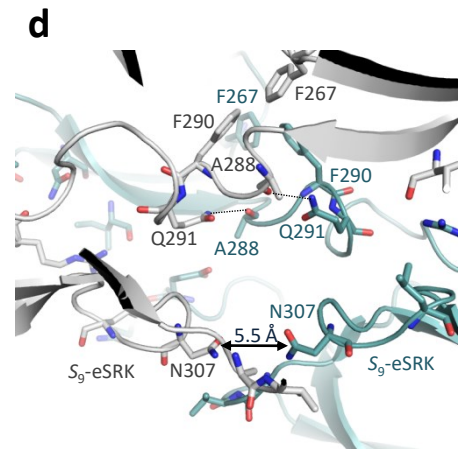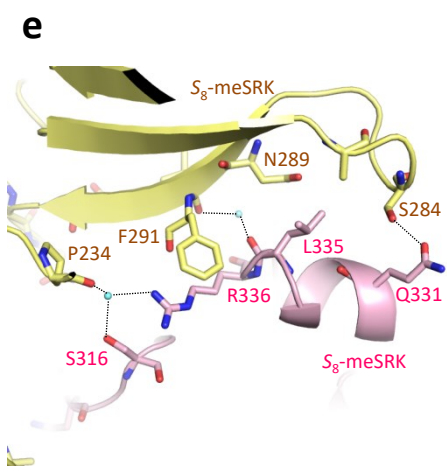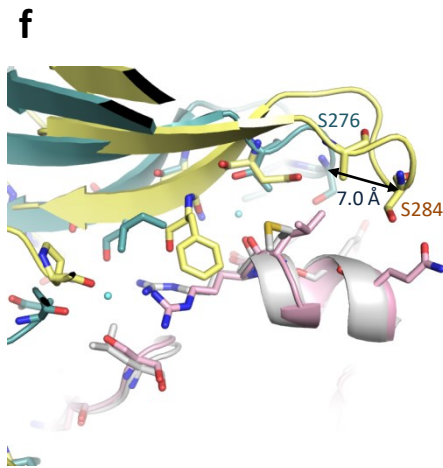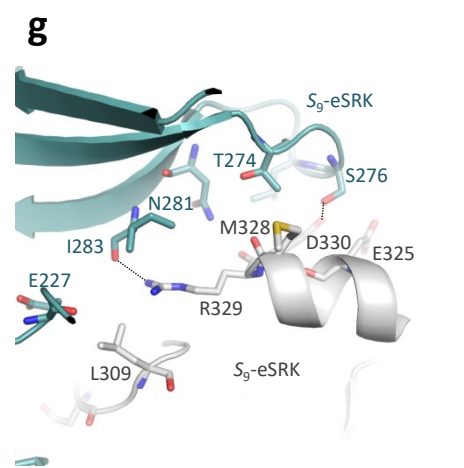

Supplementary Fig. 5

**h**

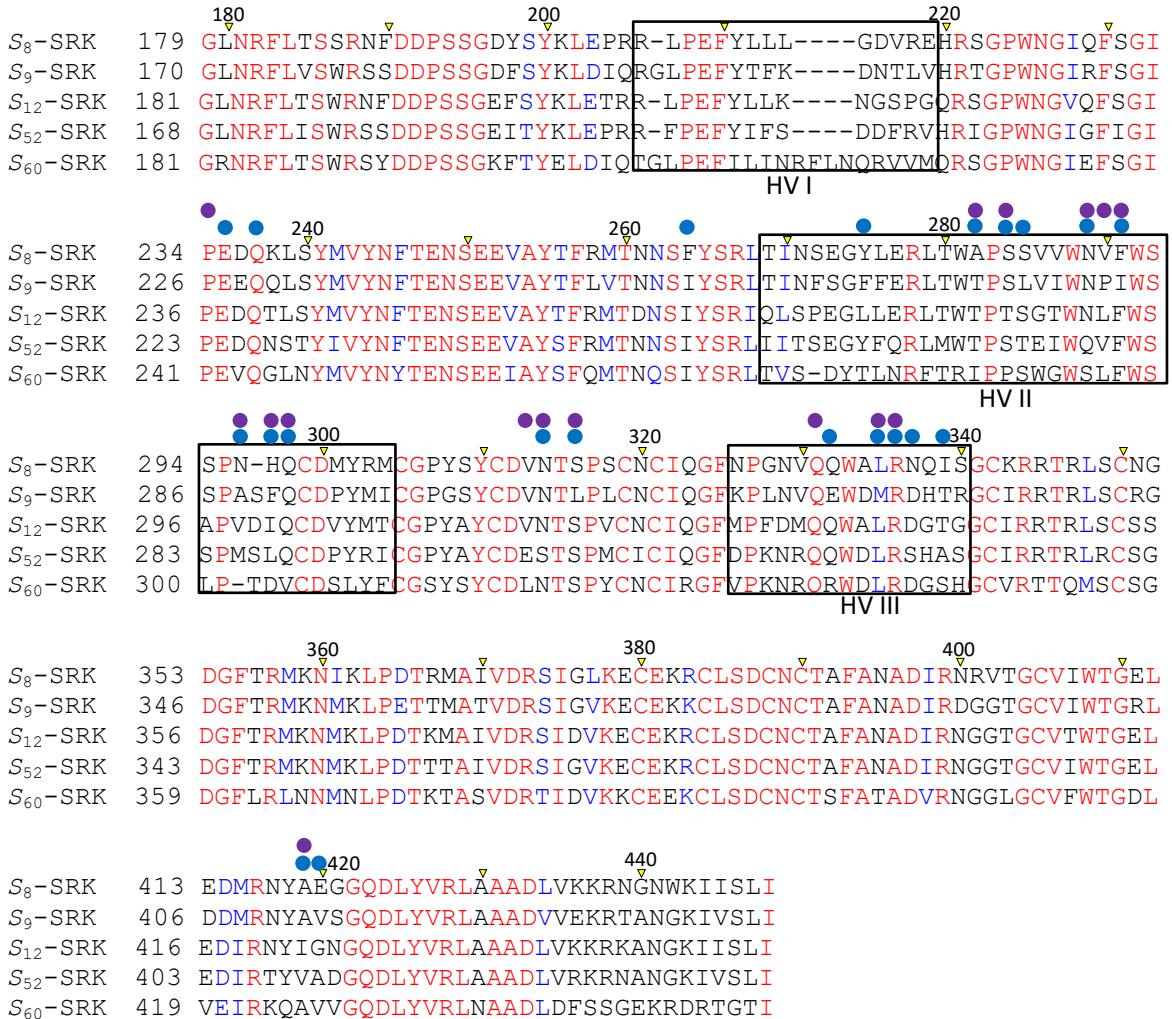

**Supplementary Fig. 5 Comparison of homodimerization interfaces between  $S_8$ -meSRK and  $S_9$ -eSRK.** **a**, Molecular surfaces of  $S_8$ -meSRK (left) and  $S_9$ -eSRK (right). Dimerization surfaces are colored in yellow. Details of the interactions enclosed by boxes are shown in **b** and **e**. Box **e'** indicates the symmetrical region of box **e** in the  $S_8$ -meSRK dimer. **b-g**, Close-up views of eSRK dimer interfaces.  $S_8$ -meSRK is shown in pink and yellow, and  $S_9$ -eSRK in silver and cyan. **b**, **e**, Homodimer interface of  $S_8$ -meSRK. **c**, **f**, Superimpositions of  $S_8$ -meSRK (pink) and  $S_9$ -eSRK (silver). **d**, **g**, Snapshot of  $S_9$ -eSRK homodimer interface, shown as in **c** and **f**. Dotted lines represent hydrogen bonds. Water molecules are shown as small cyan spheres. **h**, Sequence alignment of *B. rapa* SRK ectodomains. Amino acids involved in eSRK-eSRK interactions are shown in purple ( $S_8$ ) and blue ( $S_9$ ) circles. Three HV regions are shown in boxes. Yellow arrowheads and upper numbers show the positions of  $S_8$ -SRK.

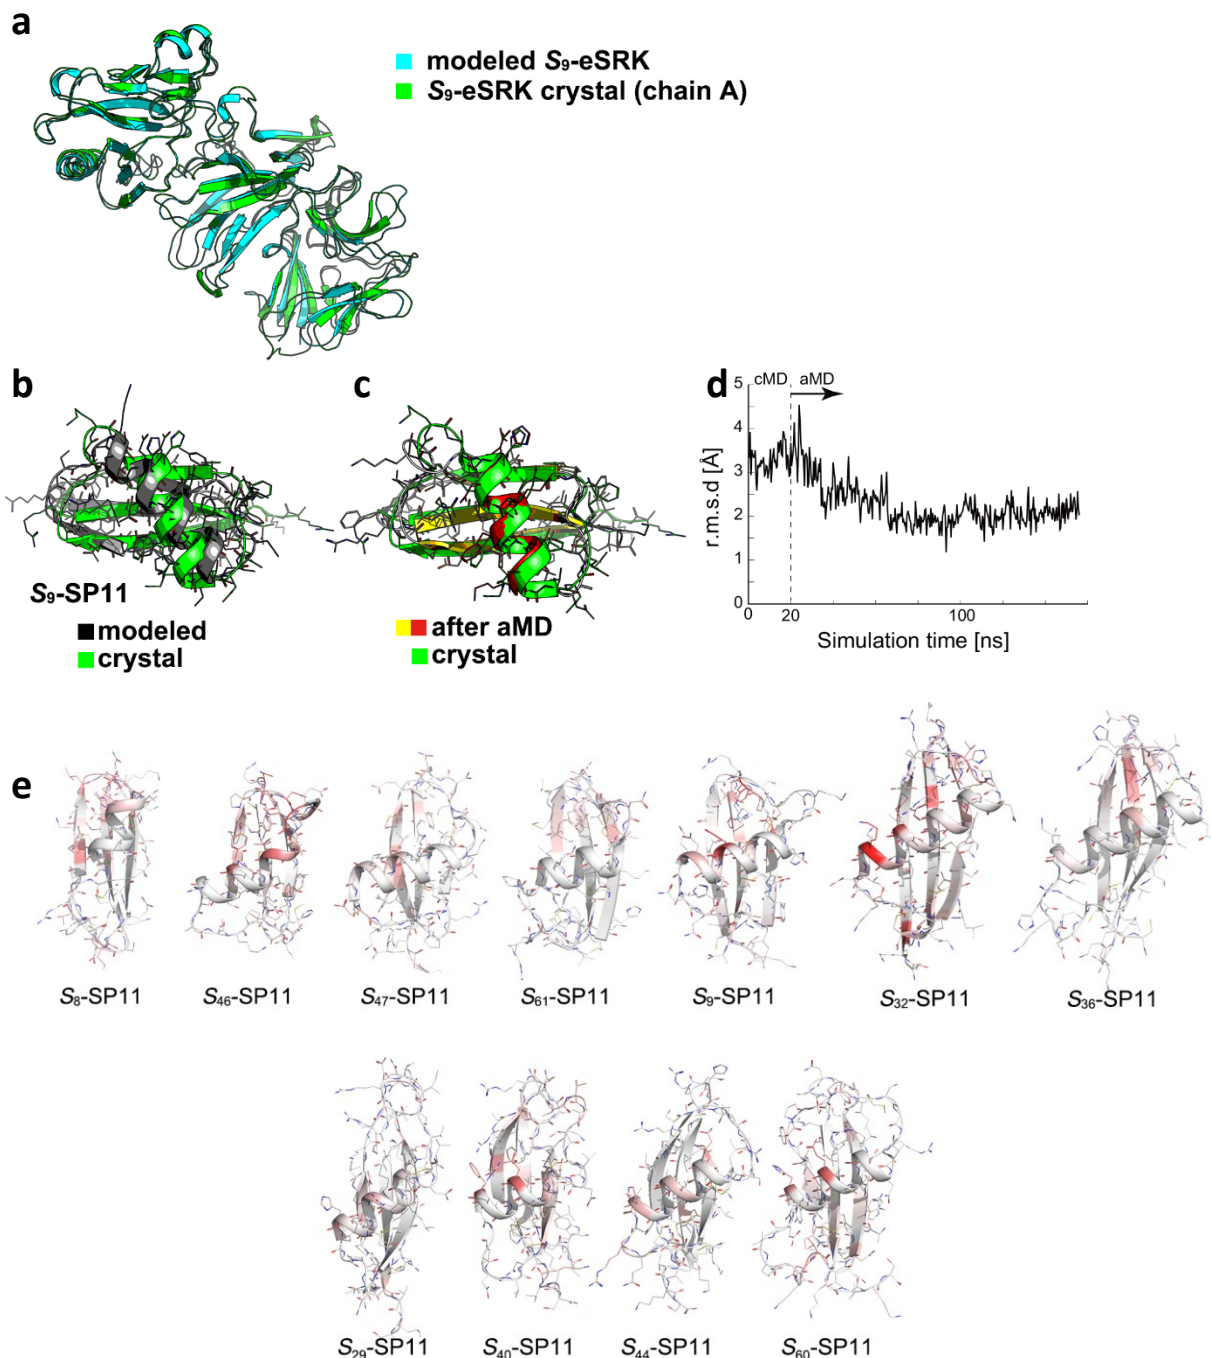

**Supplementary Fig. 6 Modeling of various SP11 structures by aMD simulation.** **a**, Structure of  $S_9$ -eSRK modeled using the crystal structure of  $S_8$ -meSRK (chain A). **b**, Initial structure of  $S_9$ -SP11, generated by homology modeling with  $S_8$ -SP11 as a template, is shown in black. Crystal structure of  $S_9$ -SP11 is depicted in green. **c**, Converged  $S_9$ -SP11 model obtained by aMD at 150 ns starting with the initial structure is shown in red (helix) and yellow (strand). **d**, Plots of rmsd over 150-ns aMD simulations. The aMD was conducted after 20-ns conventional MD simulations. The rmsd values were calculated for all  $C\alpha$  atoms of the crystal structure of  $S_9$ -SP11. **e**, Modeled SP11 structures ( $S_{32}$ ,  $S_{36}$ ,  $S_{46}$ ,  $S_{47}$ ,  $S_{61}$ ,  $S_{29}$ ,  $S_{40}$ ,  $S_{44}$ , and  $S_{60}$ ) after aMD improvement. Important residues for binding to the self-eSRK calculated by MM-GBSA are shown in red.



SRK

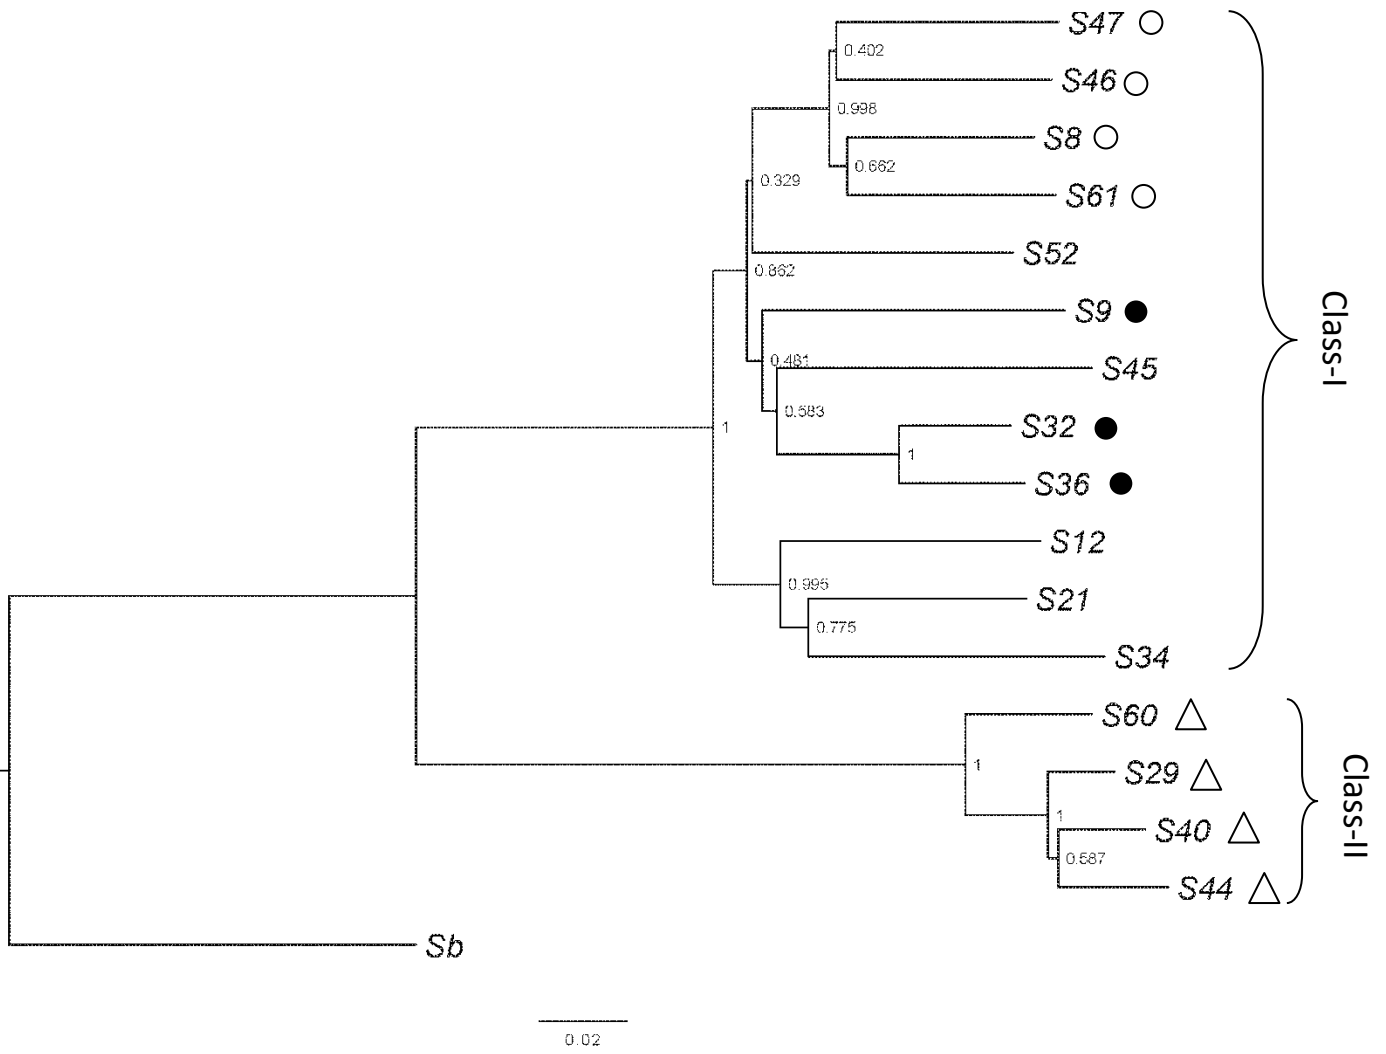

Supplementary Fig. 7

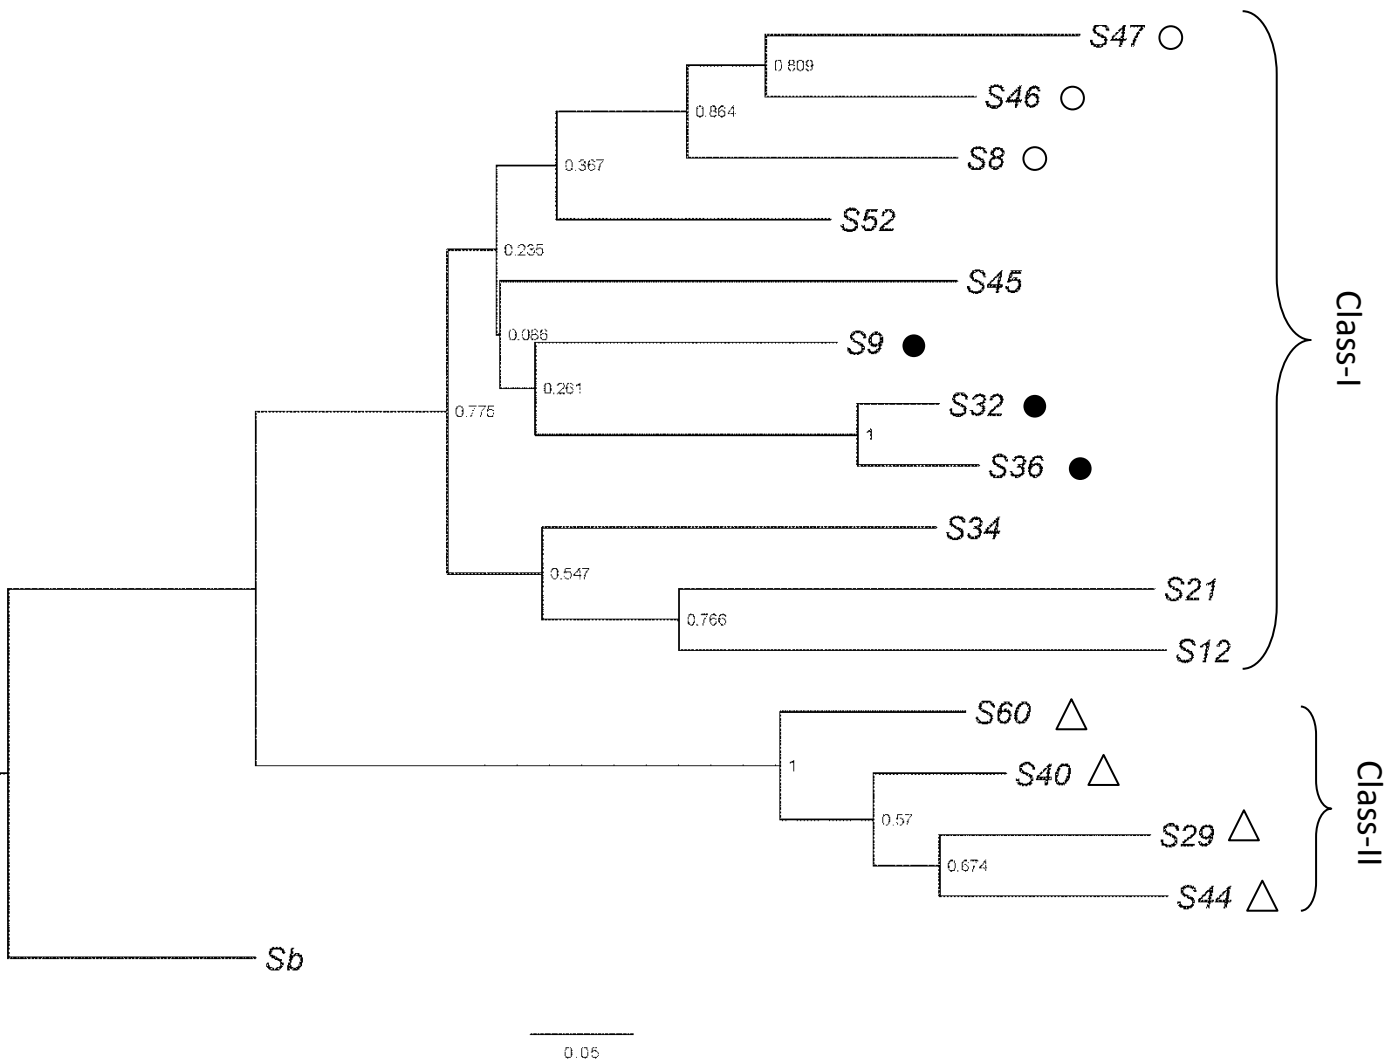

**Supplementary Fig. 7 Phylogenetic trees of *Brassica SRK* and *SP11*.** *S*-haplotypes categorized in the *S*<sub>8</sub>-, *S*<sub>9</sub>-, and class-II subgroups by MM-GBSA analysis are located in the same clades. White circles, black circles, and white triangles show the member of *S*<sub>8</sub>-, *S*<sub>9</sub>-, and class-II subgroups analyzed in this study, respectively. *S<sub>b</sub>*-*SRK* and *S<sub>b</sub>*-*SP11* sequences from *Arabidopsis lyrata* were used as the root. Sequences and accession numbers used in these trees are listed in Supplementary Data 1. *S*<sub>61</sub>-*SP11* sequence was excluded from the tree because only a partial sequence was available.

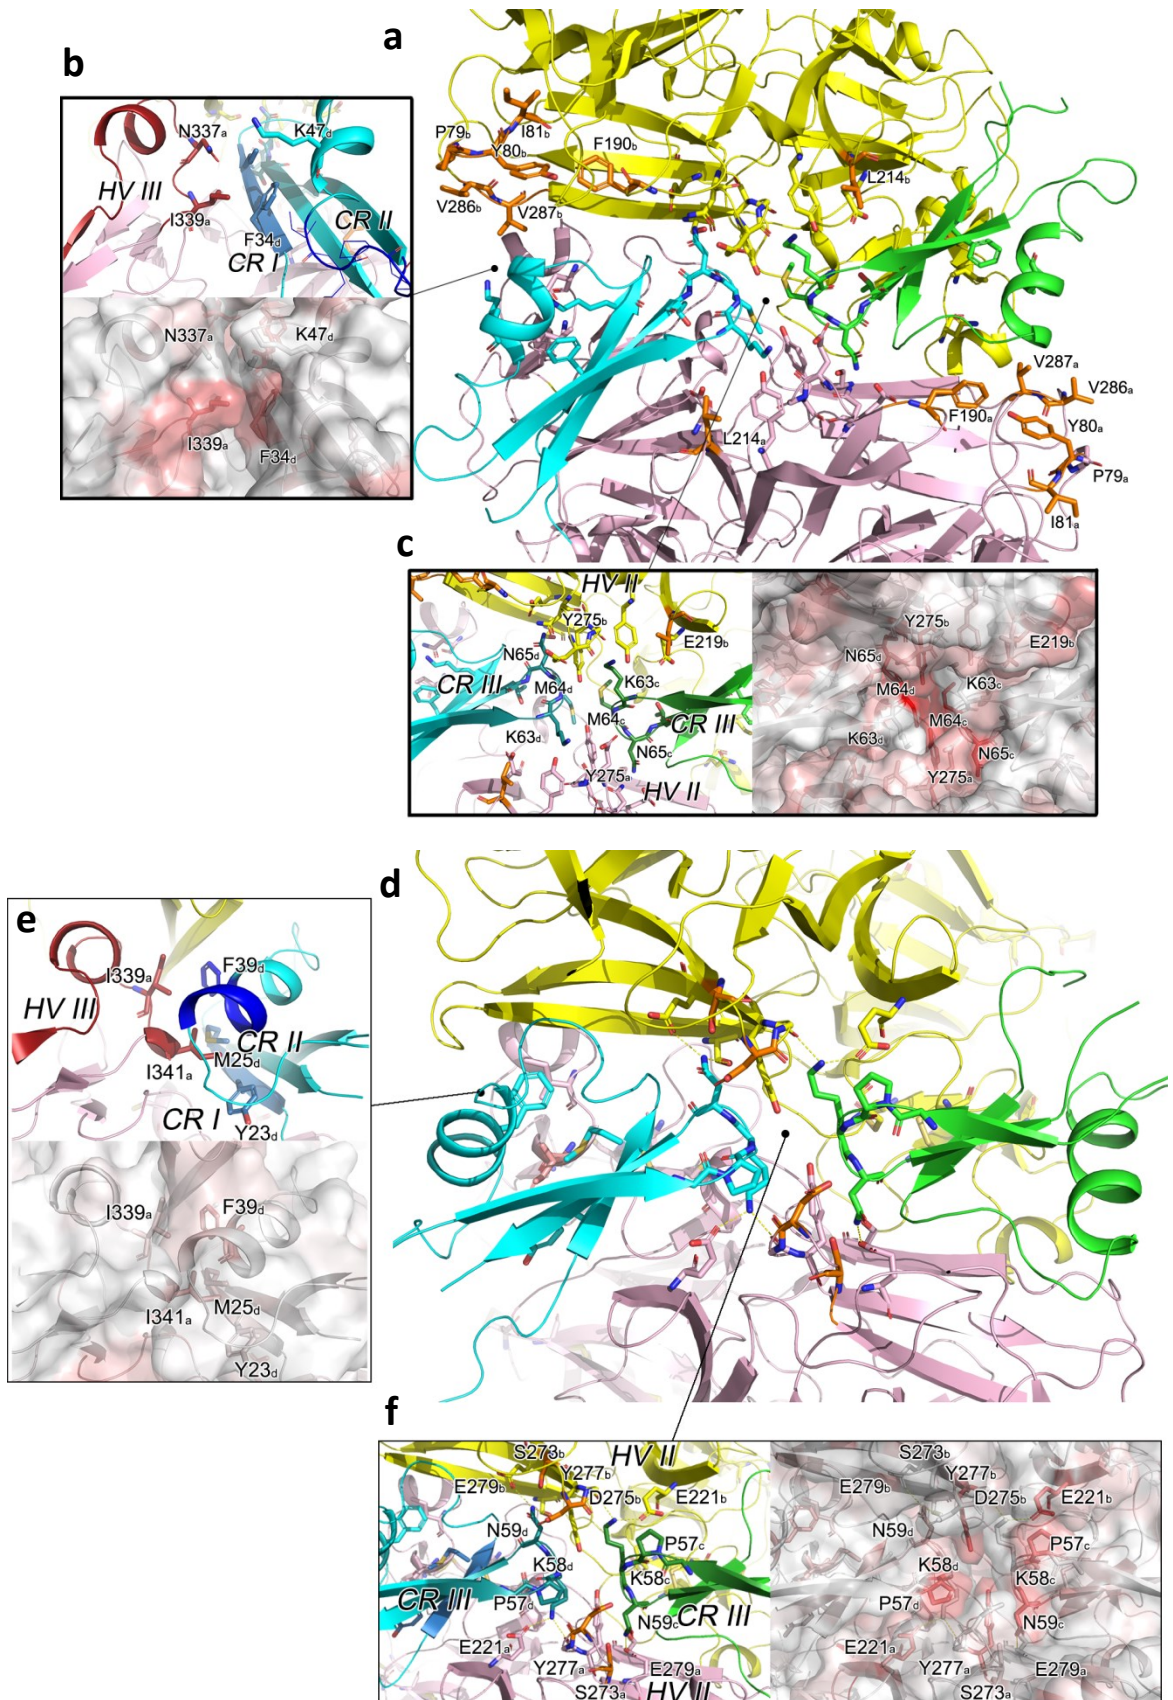

Supplementary Fig. 8



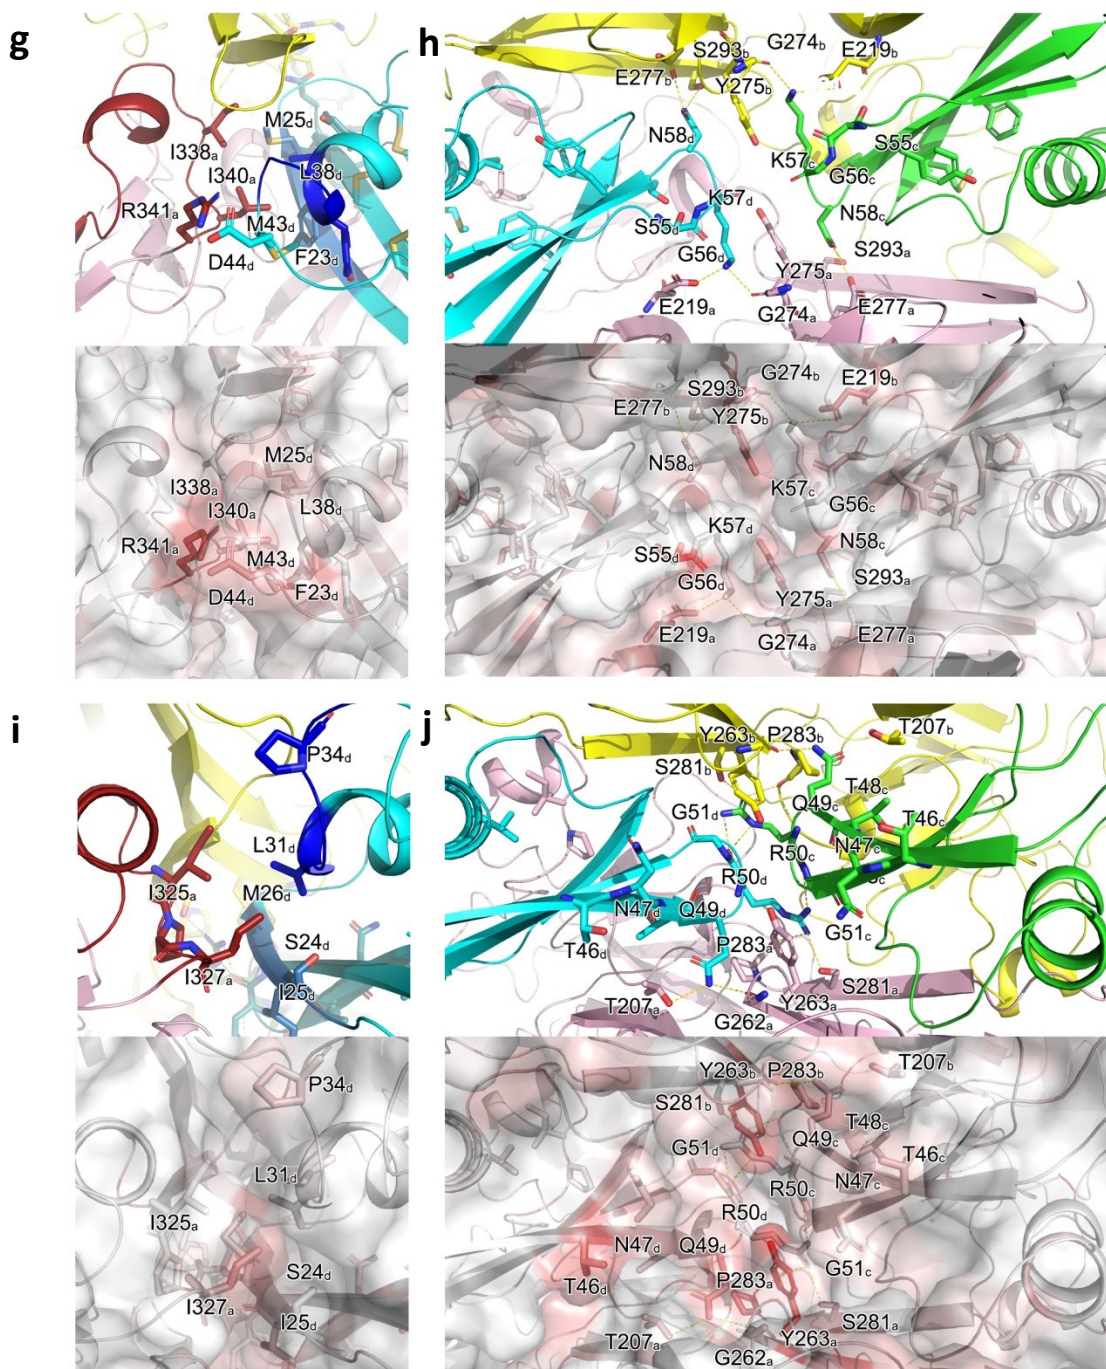

**Supplementary Fig. 8 eSRK–SP11 model structures in  $S_8$ -subgroup.** Modeled complex structures of  $S_8$ - (a–c),  $S_{46}$ - (d–f),  $S_{47}$ - (g, h), and  $S_{61}$ - (i, j) haplotypes are shown. Cyan and green represent SP11, and yellow and pink represent eSRK. **a, d**, Overall structure of  $S_8$ - (a) and  $S_{46}$ - (d) complex structures after 150-ns MD simulations. Mutated residues in  $S_8$ -meSRK (a) and in  $S_{46}$ -eSRK (d) used for pull-down assays shown in Fig. 4b are indicated in orange. **b, e, g, i**, Top panels show close-up views of the interfaces around eSRK-HV III, SP11-CR I, and SP11-CR II in  $S_8$ - (b),  $S_{46}$ - (e),  $S_{47}$ - (g), and  $S_{61}$ - (i) complexes, respectively. Ruby, marine, and blue represent HV III, CR I, and CR II, respectively. **c, f, h, j**, Left (c, f) and top (h, j) panels show close-up views of the interfaces where two eSRK and two SP11 molecules make contact in  $S_8$ - (c),  $S_{46}$ - (f),  $S_{47}$ - (h), and  $S_{61}$ - (j) complexes, respectively. Important residues for  $\Delta G$  calculated by MM–GBSA are shown in red (c, f, right; h, j, bottom). Subscripts to the right of residue numbers indicate chain ID in the complex (a, b, eSRK; c, d, SP11).



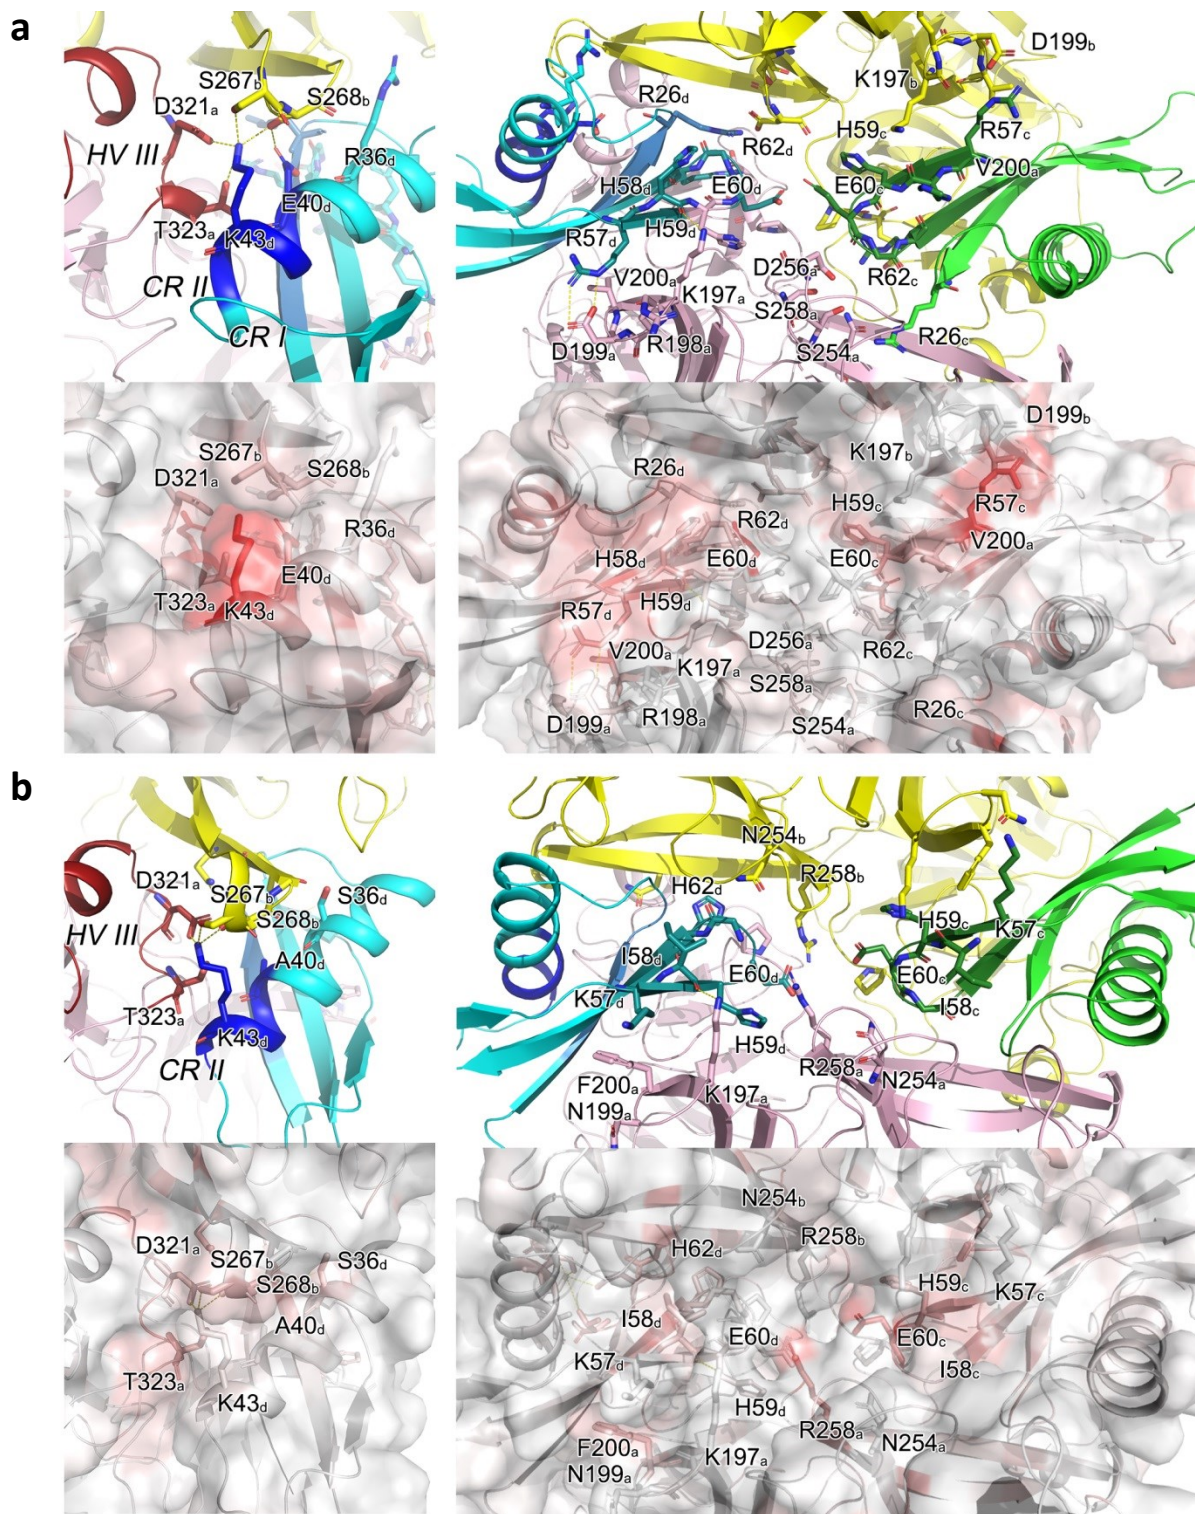

**Supplementary Fig. 9 eSRK–SP11 complex structure models in  $S_0$ -subgroup.** Model structures of  $S_{32}$ - (a) and  $S_{36}$ - (b) complexes. Cyan and green represent SP11, whereas yellow and pink represent eSRK. Close-up views of the interfaces around eSRK-HV III, SP11-CR I, and SP11-CR II are shown in the left upper panels, and close-up views of the interfaces where two eSRK and two SP11 molecules make contact are shown in the right upper panels. Dotted lines represent hydrogen bonds. Important residues for  $\Delta G$  calculated by MM–GBSA are shown in red (bottom). Subscripts to the right of residue numbers indicate chain ID in the complex (a, b, eSRK; c, d, SP11).



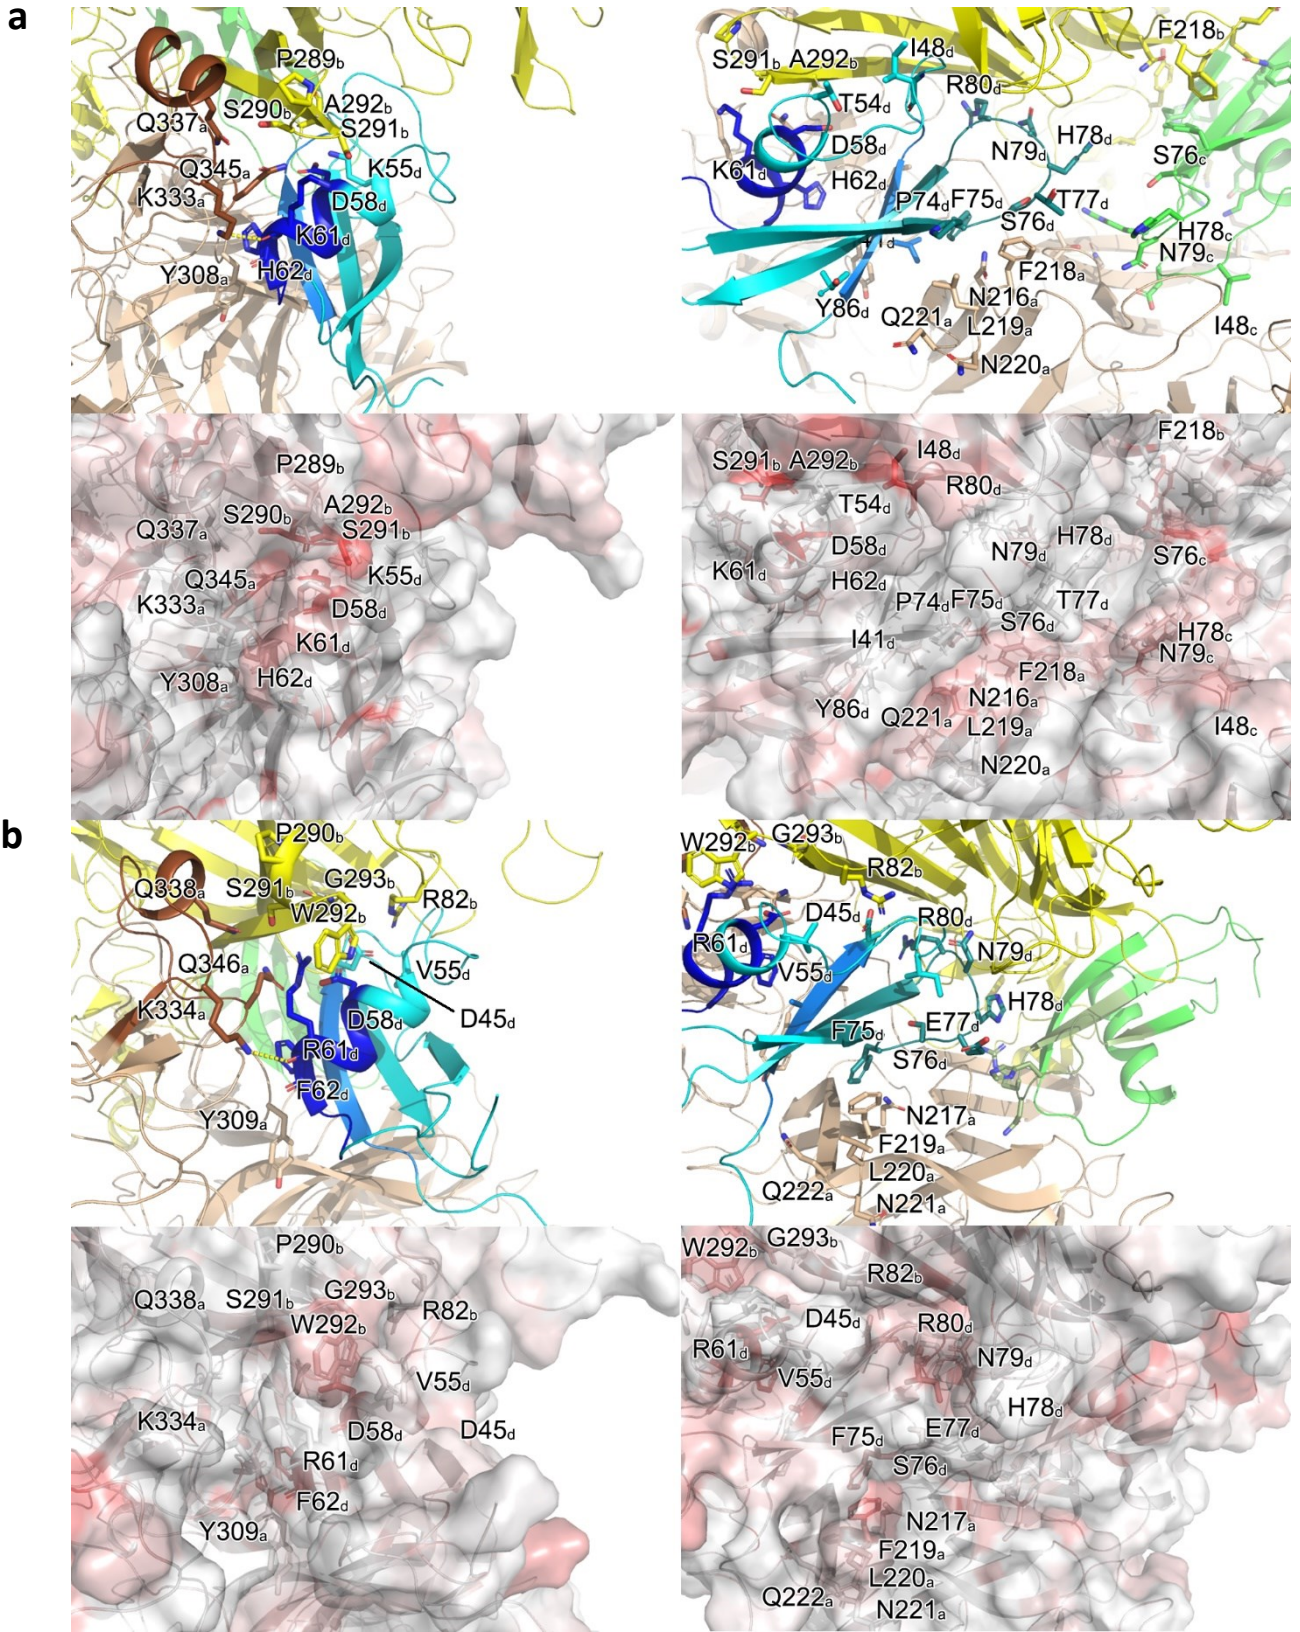



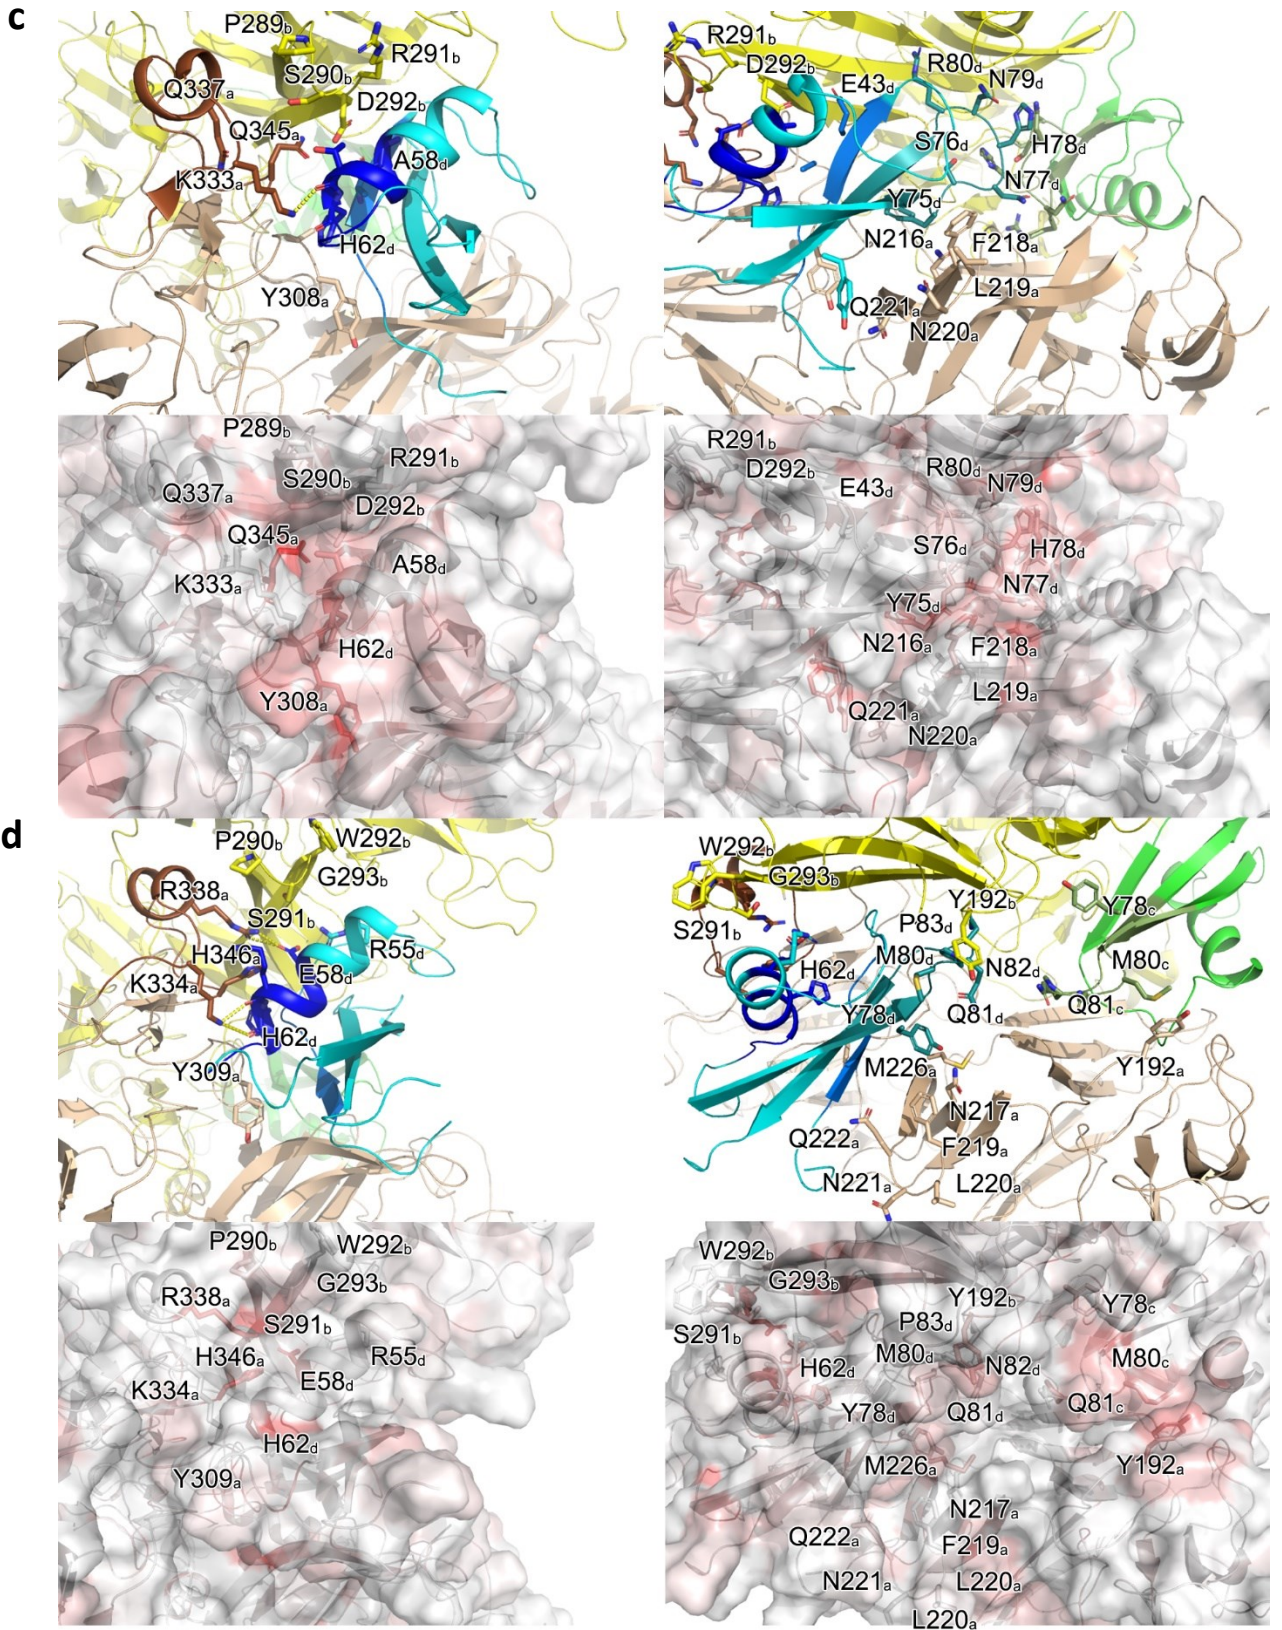

Supplementary Fig. 10

**Supplementary Fig. 10 eSRK–SP11 complex structure models in the class-II subgroup.** Model structures of  $S_{29}$ - (a),  $S_{40}$ - (b),  $S_{44}$ - (c), and  $S_{60}$ - (d) complexes. Cyan and green represent SP11, while yellow and light orange represent eSRK. Close-up views of the interfaces around eSRK-HV III, SP11-CR I, and SP11-CR II are shown in the left upper panels, while close-up views of the interfaces where two eSRK and two SP11 molecules make contact are shown in the right upper panels. Ruby, marine, and blue represent HV III, CR I, and CR II, respectively. Dotted lines represent hydrogen bonds. Important residues for  $\Delta G$  calculated by MM–GBSA are shown in red (bottom). Subscripts to the right of residue numbers indicate chain ID in the complex (a, b, eSRK; c, d, SP11).

Fig. 1a

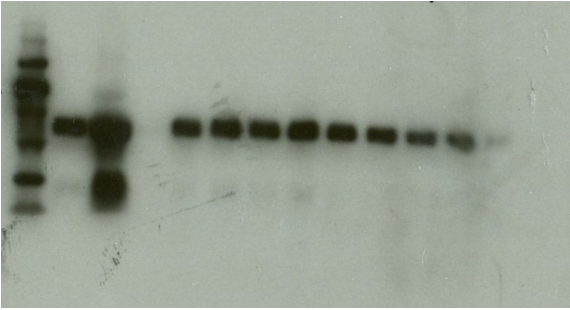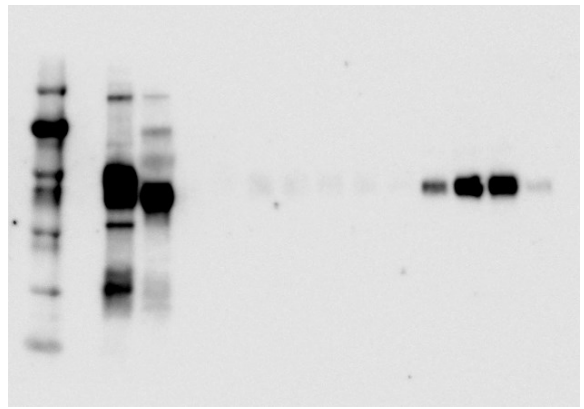

Fig. 1b

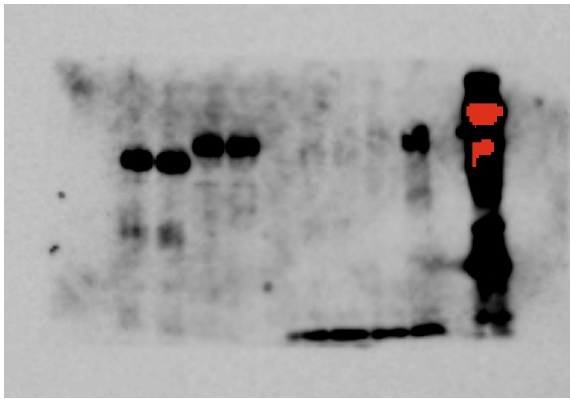

Fig. 2j

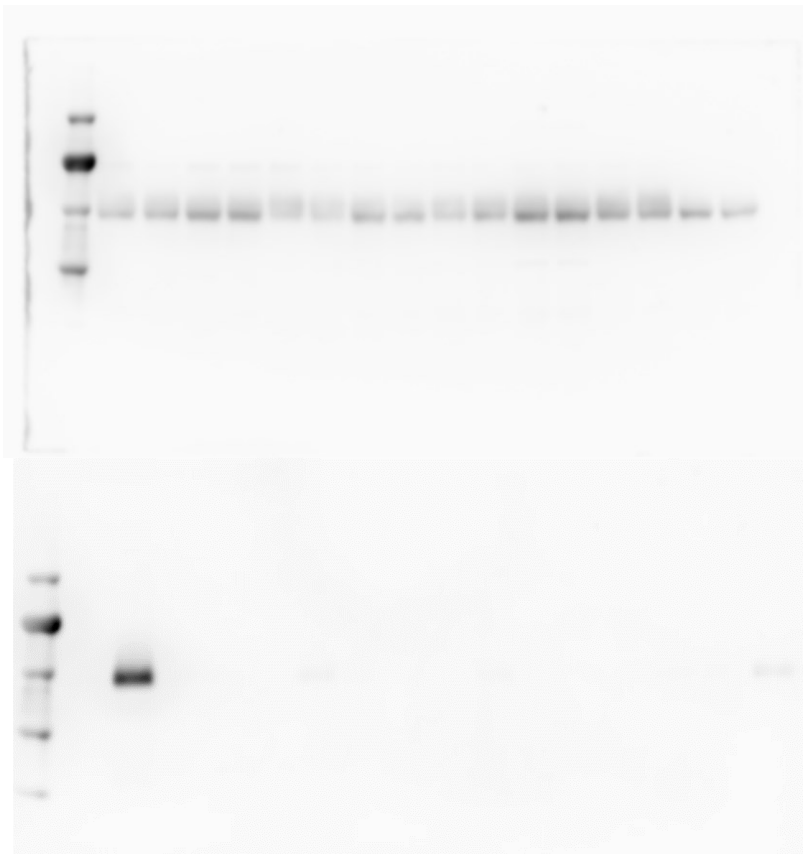

Fig. 4b

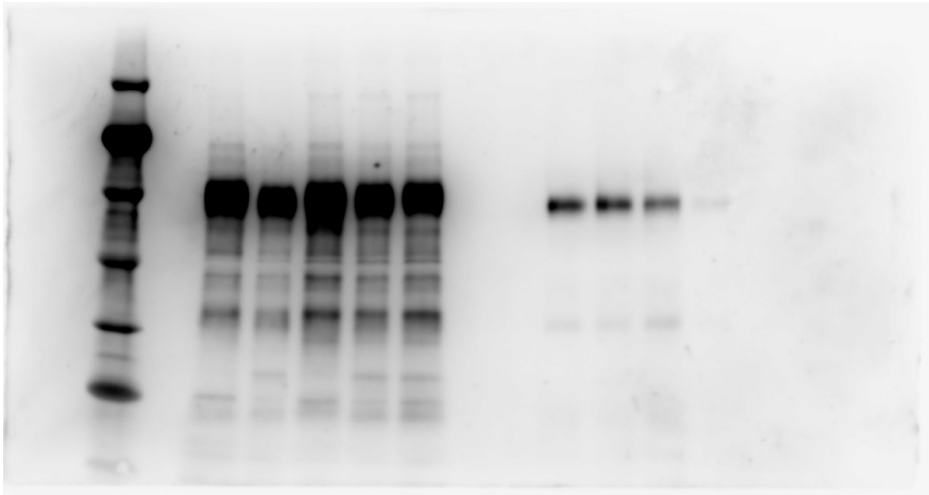

Upper panel

Lower panel

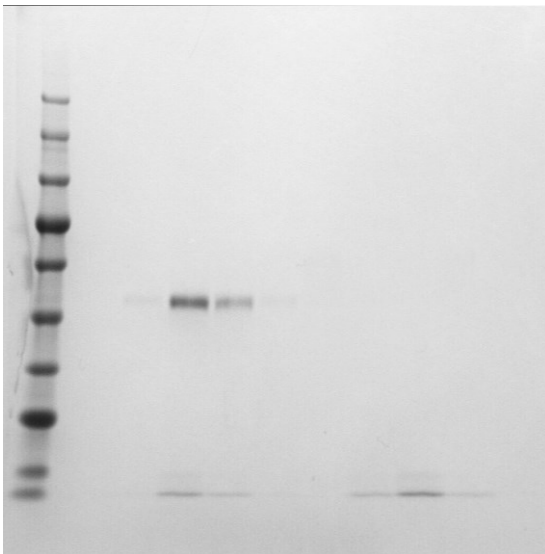

Supplementary Fig1. c  
CBB staining

Supplementary Fig. 11 Uncropped gel/blot images from Figures.



**Supplementary Table 1 Statistics of the data collection and refinement.**

|                                                     | <i>S</i> <sub>8</sub> -meSRK- <i>S</i> <sub>8</sub> -SP11 | SeMet- <i>S</i> <sub>8</sub> -meSRK- <i>S</i> <sub>8</sub> -SP11 |
|-----------------------------------------------------|-----------------------------------------------------------|------------------------------------------------------------------|
| <b>Data collection</b>                              |                                                           |                                                                  |
| Space group                                         | <i>P</i> 4 <sub>1</sub> 2 <sub>1</sub> 2                  | <i>P</i> 4 <sub>1</sub> 2 <sub>1</sub> 2                         |
| Cell dimensions                                     |                                                           |                                                                  |
| <i>a</i> , <i>b</i> , <i>c</i> (Å)                  | 143.56, 143.56, 194.40                                    | 142.69, 142.69, 194.76                                           |
| $\alpha$ , $\beta$ , $\gamma$ (°)                   | 90.0, 90.0, 90.0                                          | 90.0, 90.0, 90.0                                                 |
| Wavelength (Å)                                      | 0.9000                                                    | 0.9791                                                           |
| Resolution (Å)                                      | 50.0-2.60 (2.64-2.60)*                                    | 50.0-3.50 (3.56-3.50)                                            |
| No. of reflections                                  |                                                           |                                                                  |
| Total                                               | 424,212                                                   | 592,261                                                          |
| Unique                                              | 59,763                                                    | 48,219                                                           |
| <i>R</i> <sub>merge</sub>                           | 0.10 (0.63)                                               | 0.14 (0.48)                                                      |
| <i>I</i> / $\sigma$                                 | 41.3 (5.38)                                               | 18.2 (4.23)                                                      |
| Completeness (%)                                    | 94.9 (97.5)                                               | 100 (100)                                                        |
| Redundancy                                          | 7.1 (7.7)                                                 | 12.3 (12.4)                                                      |
| CC1/2                                               | †(0.87)                                                   |                                                                  |
| <b>Refinement</b>                                   |                                                           |                                                                  |
| Resolution (Å)                                      | 43.8-2.60 (2.69-2.60)                                     |                                                                  |
| <i>R</i> <sub>work</sub> / <i>R</i> <sub>free</sub> | 0.220/0.251 (0.308/0.402)                                 |                                                                  |
| No. of atoms                                        |                                                           |                                                                  |
| Protein                                             | 6,752                                                     |                                                                  |
| Sugar                                               | 70                                                        |                                                                  |
| Solvent                                             | 184                                                       |                                                                  |
| Average B-factors (Å <sup>2</sup> )                 |                                                           |                                                                  |
| Protein                                             | 61.7                                                      |                                                                  |
| Sugar                                               | 87.2                                                      |                                                                  |
| Solvent                                             | 50.6                                                      |                                                                  |
| R.m.s deviations                                    |                                                           |                                                                  |
| Bond lengths (Å)                                    | 0.012                                                     |                                                                  |
| Bond angles (°)                                     | 1.17                                                      |                                                                  |
| Ramachandran plot (%)                               |                                                           |                                                                  |
| Favored                                             | 94.0                                                      |                                                                  |
| Allowed                                             | 6.0                                                       |                                                                  |
| Outliers                                            | 0                                                         |                                                                  |

\*Values in parentheses are highest resolution shell

†HKL2000 does not calculate total value of CC1/2

## Supplementary references

1. Okamoto, S. *et al.* Self-compatibility in *Brassica napus* is caused by independent mutations in *S*-locus genes. *Plant J.* **50**, 391–400 (2007).
2. Hatakeyama, K., Takasaki, T., Watanabe, M. & Hinata, K. High sequence similarity between *SLG* and the receptor domain of *SRK* is not necessarily involved in higher dominance relationships in stigma in self-incompatible *Brassica rapa* L. *Sex. Plant Reprod.* **11**, 292–294 (1998).
3. Kusaba, M. & Nishio, T. Comparative analysis of *S* haplotypes with very similar *SLG* alleles in *Brassica rapa* and *Brassica oleracea*. *Plant J.* **17**, 83–91 (1999).
4. Takuno, S. *et al.* Effects of recombination on hitchhiking diversity in the Brassica self-incompatibility locus complex. *Genetics* **177**, 949–958 (2007).
5. Takuno, S., Oikawa, E., Kitashiba, H. & Nishio, T. Assessment of genetic diversity of accessions in Brassicaceae genetic resources by frequency distribution analysis of *S* haplotypes. *Theor. Appl. Genet.* **120**, 1129–1138 (2010).
6. Kusaba, M. *et al.* Self-incompatibility in the genus *Arabidopsis*: characterization of the *S* locus in the outcrossing *A. lyrata* and its autogamous relative *A. thaliana*. *Plant Cell* **13**, 627–643 (2001).
