# Supplementary material for: Mechanism of self/nonself-discrimination in Brassica self-incompatibility
Source: Nat Commun. 2020 Oct 1;11:4916. doi: 10.1038/s41467-020-18698-w (PMC7530648; doi:10.1038/s41467-020-18698-w)
Supplement: Supplementary file 4 — Supplementary Data 1 [file 41467_2020_18698_MOESM4_ESM.xlsx]

## Sheet: Sheet1
	Supplementary Data 1 SRK and SP11 sequences used in this study.
	Protein	GenBank	Senquence	Sequence used for MD simulation
		Accession ID
	S8-SRK	BAF91375	MQGVRYIYHHFYTSLLVFVVMILFRSALSIYINTLSSTESLTISNNRTLVSPGDVFELGFFTPGSSSRWYLGIWYKKLPYITYVWVANRDNPLSNSTGTLKISGNNLFLLGDSNKSIWSTNLTRGNERSPVVAELLANGNFVMRDSNNNDASGFLWQSFDYPTDTLLPEMKLGYDLKTGLNRFLTSSRNFDDPSSGDYSYKLEPRRLPEFYLLLGDVREHRSGPWNGIQFSGIPEDQKLSYMVYNFTENSEEVAYTFRMTNNSFYSRLTINSEGYLERLTWAPSSVVWNVFWSSPNHQCDMYRMCGPYSYCDVNTSPSCNCIQGFNPGNVQQWALRNQISGCKRRTRLSCNGDGFTRMKNIKLPDTRMAIVDRSIGLKECEKRCLSDCNCTAFANADIR…	INTLSSTESLTISNNRTLVSPGDVFELGFFTPGSSSRWYLGIWYKKLPYITYVWVANRDNPLSNSTGTLKISGNNLFLLGDSNKSIWSTNLTRGNERSPVVAELLANGNFVMRDSNNNDASGFLWQSFDYPTDTLLPEMKLGYDLKTGLNRFLTSSRNFDDPSSGDYSYKLEPRRLPEFYLLLGDVREHRSGPWNGIQFSGIPEDQKLSYMVYNFTENSEEVAYTFRMTNNSFYSRLTINSEGYLERLTWAPSSVVWNVFWSSPNHQCDMYRMCGPYSYCDVNTSPSCNCIQGFNPGNVQQWALRNQISGCKRRTRLSCNGDGFTRMKNIKLPDTRMAIVDRSIGLKECEKRCLSDCNCTAFANADIRNRVTGCVIWTGELEDMRNYAEGGQDLYVRLA…
	S8-meSRK		MQGVRYIYHHFYTSLLVFVVMILFRSALSIYINTLSSTESLTISNNRTLVSPGDVFELGFFTPGSSSRWYLGIWYKKLSERTYVWVANRDNPLSNSTGTLKISGNNLVLRGDSNKSIWSTNLTRGNERSPVVAELLANGNFVMRDSNNNDASGFLWQSFDYPTDTLLPEMKLGYDLKTGRNRFLTSSRNSDDPSSGDYSYKLEPRRLPEFYLLQGDVREHRSGPWNGIQFSGIPEDQKSSYMVYNFTENSEEVAYTFRMTNNSFYSRLTINSEGYLERLTWAPSSGAWNVFWSSPNHQCDMYRMCGPYSYCDVNTSPSCNCIQGFNPGNVQQWALRNQISGCKRRTRLSCNGDGFTRMKNIKLPDTRMAIVDRSIGLKECEKRCLSDCNCTAFANADIR…
	S9-SRK	BAA21132	MKGVRNIYHHSYTFLLVFFVMILFRPAFSLSTLSSTESLTISSNRTLVSPGNIFELGFFRTNSRWYLGMWYKKLSGRTYVWVANRDNPLSNSIGTLKISNMNLVLLDHSNKSVWSTNLTRENVRSPVVAELLANGNFVVRDPSGFLWQSFDYPTDTLLPEMKLGYDLKTGLNRFLVSWRSSDDPSSGDFSYKLDIQRGLPEFYTFKDNTLVHRTGPWNGIRFSGIPEEQQLSYMVYNFTENSEEVAYTFLVTNNSIYSRLTINFSGFFERLTWTPSLVIWNPIWSSPASFQCDPYMICGPGSYCDVNTLPLCNCIQGFKPLNVQEWDMRDHTRGCIRRTRLSCRGDGFTRMKNMKLPETTMATVDRSIGVKECEKKCLSDCNCTAFANADIRDGGTGCV…	FSLSTLSSTESLTISSNRTLVSPGNIFELGFFRTNSRWYLGMWYKKLSGRTYVWVANRDNPLSNSIGTLKISNMNLVLLDHSNKSVWSTNLTRENVRSPVVAELLANGNFVVRDPSGFLWQSFDYPTDTLLPEMKLGYDLKTGLNRFLVSWRSSDDPSSGDFSYKLDIQRGLPEFYTFKDNTLVHRTGPWNGIRFSGIPEEQQLSYMVYNFTENSEEVAYTFLVTNNSIYSRLTINFSGFFERLTWTPSLVIWNPIWSSPASFQCDPYMICGPGSYCDVNTLPLCNCIQGFKPLNVQEWDMRDHTRGCIRRTRLSCRGDGFTRMKNMKLPETTMATVDRSIGVKECEKKCLSDCNCTAFANADIRDGGTGCVIWTGRLDDMRNYAVSGQDLYVRLAAADV
	S12-SRK	BAA07577	MKCVRNIYYQSYTFSFVLAFVVLILFHPAISMHFNTLLSTESLTISGNRTLVSPGHVFELGFFKNTLNSRWYLGIWYKNLSDRTYVWVANRDSSLSNAIGTLKFSGSNLVLRGRSNKFVWSTNLTRGNERSPVVAELLANGNFVIRYSYNNDASGFLWQSFDFPTDTLLPEMKLGYYLKTGLNRFLTSWRNFDDPSSGEFSYKLETRRLPEFYLLKNGSPGQRSGPWNGVQFSGIPEDQTLSYMVYNFTENSEEVAYTFRMTDNSIYSRIQLSPEGLLERLTWTPTSGTWNLFWSAPVDIQCDVYMTCGPYAYCDVNTSPVCNCIQGFMPFDMQQWALRDGTGGCIRRTRLSCSSDGFTRMKNMKLPDTKMAIVDRSIDVKECEKRCLSDCNCTAFANA…	FNTLLSTESLTISGNRTLVSPGHVFELGFFKNTLNSRWYLGIWYKNLSDRTYVWVANRDSSLSNAIGTLKFSGSNLVLRGRSNKFVWSTNLTRGNERSPVVAELLANGNFVIRYSYNNDASGFLWQSFDFPTDTLLPEMKLGYYLKTGLNRFLTSWRNFDDPSSGEFSYKLETRRLPEFYLLKNGSPGQRSGPWNGVQFSGIPEDQTLSYMVYNFTENSEEVAYTFRMTDNSIYSRIQLSPEGLLERLTWTPTSGTWNLFWSAPVDIQCDVYMTCGPYAYCDVNTSPVCNCIQGFMPFDMQQWALRDGTGGCIRRTRLSCSSDGFTRMKNMKLPDTKMAIVDRSIDVKECEKRCLSDCNCTAFANADIRNGGTGCVTWTGELEDIRNYIGNGQDLYVRL…
	S21-SRK	BAF57003	MKGVRKTYDNSYTLSFLLVFFVMILFRPALSMYFNTLSSTESLTISNNRTLVSPGDVFELGFFRTNSSSPWYLGIWYKQLSERTYVWVANRDSPLSNAMGILKISGNNLVILDHSNKSVWSTNLTRGNERSPVVAELLANGNFVMRDSNNNDASGFLWQSFDYPTDTLLPEMELGYDLKTRLNRFLTSWKNSDDPSSGEISYKLDTQRGLPEFYLLKDGLRAQRSGPWNGVKFSGIPEDQKLNYMVYNFIENSEEVAYTFRMTNNSIYSRIQVSPAGFLARLTTTPTAWEWNWFWYAPEDPQCDVYKTCGPYAYCDLNTSPLCNCIQGFKPFDEQQWDLRNPSGGCIRRTPLSCSGDGFTRMKNMKLPETTMAVVDRSIGVKECEKMCLSDCNCTAFAN…	FNTLSSTESLTISNNRTLVSPGDVFELGFFRTNSSSPWYLGIWYKQLSERTYVWVANRDSPLSNAMGILKISGNNLVILDHSNKSVWSTNLTRGNERSPVVAELLANGNFVMRDSNNNDASGFLWQSFDYPTDTLLPEMELGYDLKTRLNRFLTSWKNSDDPSSGEISYKLDTQRGLPEFYLLKDGLRAQRSGPWNGVKFSGIPEDQKLNYMVYNFIENSEEVAYTFRMTNNSIYSRIQVSPAGFLARLTTTPTAWEWNWFWYAPEDPQCDVYKTCGPYAYCDLNTSPLCNCIQGFKPFDEQQWDLRNPSGGCIRRTPLSCSGDGFTRMKNMKLPETTMAVVDRSIGVKECEKMCLSDCNCTAFANADIRNGGTGCVIWTGELEDIRNYFDDGQDLYVR…
	S22-SRK	BAB21001	IYFNTLSSTETLTISSNRTLVSPGDVFELGFFRTNSSSGWYLGIWYKKVSYRTSVWVANRDSPLFNAIGTLKISSNNLVLRGQSNKSVWSTNLTRGNERFPVVAELLANGNFVIRYSNKNDASGFLWQSFDYPTDTLLPEMKLGYDLKTEQNRFLTSWRNSDDPSSGEISYFLDTESGMPEFYLLKSGLRAYRSGPWNGVRFSGIPGDQYLSYMVYNYTENSEEVAYTFRMTTHSIYSRLKISSKGFLERLTWTPTSIAWNLIWYLPVENQCDVYMVCGVYSYCDENTSPMCNCIQGFMPLNEQRWDLRDWSSGCTRRTRLSCSGDGFTRMRKMKLPETKMANVYRSIGVKECEKRCLSDCNCTAFANADIRNGGTGCVIWTGRLDDIRNYYADGQDLY…	FNTLSSTETLTISSNRTLVSPGDVFELGFFRTNSSSGWYLGIWYKKVSYRTSVWVANRDSPLFNAIGTLKISSNNLVLRGQSNKSVWSTNLTRGNERFPVVAELLANGNFVIRYSNKNDASGFLWQSFDYPTDTLLPEMKLGYDLKTEQNRFLTSWRNSDDPSSGEISYFLDTESGMPEFYLLKSGLRAYRSGPWNGVRFSGIPGDQYLSYMVYNYTENSEEVAYTFRMTTHSIYSRLKISSKGFLERLTWTPTSIAWNLIWYLPVENQCDVYMVCGVYSYCDENTSPMCNCIQGFMPLNEQRWDLRDWSSGCTRRTRLSCSGDGFTRMRKMKLPETKMANVYRSIGVKECEKRCLSDCNCTAFANADIRNGGTGCVIWTGRLDDIRNYYADGQDLYVR…
	S25-SRK	BAF91385	FLLVFFVMILFHPALSMYINTLSSTESLTISNNRTLASPGDVFELGFFRTNSSSPWYLGIWYKKVSDRTYVWVANRDNPLSSSIGTLKISGNNLVILDHSNKSVWSTNLTRGNERSPVVAELLANGNFVMRDSNNNDASGFLWQSFNFPTDTLLPEMKLGFKLKTGLDRFLTSWRSSDDPSSGEFLYKLQTRRFPEFYLSSGVFLLYRSGPWNGIRFSGLPDDQKLSYLVYNFTKNNEEVAYTFRMTNNSFYSRLTLNFLGYIERQTWNPSLGMWSRFWAFPLDSQCDTYRACGPYSYCDLNTSPICNCIQGFNPSNVEQWDQRVWANGCMRRTRLSCSGDGFTKMKNMKLPETTMAIVDRSIGVKECEKRCLNDCNCTAFANADIRNGGTGCVIWTGE…	INTLSSTESLTISNNRTLASPGDVFELGFFRTNSSSPWYLGIWYKKVSDRTYVWVANRDNPLSSSIGTLKISGNNLVILDHSNKSVWSTNLTRGNERSPVVAELLANGNFVMRDSNNNDASGFLWQSFNFPTDTLLPEMKLGFKLKTGLDRFLTSWRSSDDPSSGEFLYKLQTRRFPEFYLSSGVFLLYRSGPWNGIRFSGLPDDQKLSYLVYNFTKNNEEVAYTFRMTNNSFYSRLTLNFLGYIERQTWNPSLGMWSRFWAFPLDSQCDTYRACGPYSYCDLNTSPICNCIQGFNPSNVEQWDQRVWANGCMRRTRLSCSGDGFTKMKNMKLPETTMAIVDRSIGVKECEKRCLNDCNCTAFANADIRNGGTGCVIWTGELEDMRNYAAAGQDLYVRL…
	S29-SRK	BAA31252	MKRVQNIYHHSYTSFLLVFLVLILFHPALSIYVNTMSSSESLTISSNRTLVSPGGVFELGFFKTLERSRWYLGIWYKKVPWKTYAWVANRDNPLSNSIGTLKISGNNLVLLGQSNNTVWSTNFTRGNARSPVIAELLPNGNFVMRHSNNKDSNGFLWQSFDFPTDTLLPEMKLGYNLKTGRNRFLTSWKSSDDPSSGNFAYKLDLRRGLPEFILINTFLNQRVETQRSGPWNGMEFSGIPEVQGLNYMVYNYTENSEEISYSFHMTNQSIYSRLTVSELTLNRFTWIPPSSAWSLFWTLPTDVCDPLYLCGSYSYCDLITSPNCNCIRGFVPKNPQQWDLRDGTQGCVRTTQMSCSGDGFLRLNNMNLPDTKTATVDRTIDVKKCEERCLSDCNCTSFA…	VNTMSSSESLTISSNRTLVSPGGVFELGFFKTLERSRWYLGIWYKKVPWKTYAWVANRDNPLSNSIGTLKISGNNLVLLGQSNNTVWSTNFTRGNARSPVIAELLPNGNFVMRHSNNKDSNGFLWQSFDFPTDTLLPEMKLGYNLKTGRNRFLTSWKSSDDPSSGNFAYKLDLRRGLPEFILINTFLNQRVETQRSGPWNGMEFSGIPEVQGLNYMVYNYTENSEEISYSFHMTNQSIYSRLTVSELTLNRFTWIPPSSAWSLFWTLPTDVCDPLYLCGSYSYCDLITSPNCNCIRGFVPKNPQQWDLRDGTQGCVRTTQMSCSGDGFLRLNNMNLPDTKTATVDRTIDVKKCEERCLSDCNCTSFAAADVRNGGLGCVFWTGELVAIRKFAVGGQDLY…
	S32-SRK	BAC24028	TFSYLLVFVVMILFHPALSIYINTLSSTESLTISSNRTLVSPGSIFELGFFRTNSRWYLGMWYKELSERTYVWVANRDNPISNSIGTLKISGNNLVLLGHSNKSVWSTNLTRENERSPVVAELLANGNFVMRDSSGFLWQSFDFPTDTLLPEMKLGYDLKTRLNRFLVSWRSLNDPSSGNFSYRLETRRLPEFYLSKRDVPVHRSGPWNGIRFSGIPEDEKLSYMVYNFTENSEEAAYTFLMTNNNIYSRLTISSDGSFQRLTWTPSSGAWNVFWSSPVNPECDLYMICGPDAYCDVNTSPSCICIQGFNPKDLPQWDLRDWTSGCIRRTRLSCRGDGFTRMKNMKLPETTMAIVDRSIGIKECKKRCLSDCNCTAFANADIRNGGTGCVIWTGQLDDI…	INTLSSTESLTISSNRTLVSPGSIFELGFFRTNSRWYLGMWYKELSERTYVWVANRDNPISNSIGTLKISGNNLVLLGHSNKSVWSTNLTRENERSPVVAELLANGNFVMRDSSGFLWQSFDFPTDTLLPEMKLGYDLKTRLNRFLVSWRSLNDPSSGNFSYRLETRRLPEFYLSKRDVPVHRSGPWNGIRFSGIPEDEKLSYMVYNFTENSEEAAYTFLMTNNNIYSRLTISSDGSFQRLTWTPSSGAWNVFWSSPVNPECDLYMICGPDAYCDVNTSPSCICIQGFNPKDLPQWDLRDWTSGCIRRTRLSCRGDGFTRMKNMKLPETTMAIVDRSIGIKECKKRCLSDCNCTAFANADIRNGGTGCVIWTGQLDDIRNYGTDGQDLYVRLAAAD
	S34-SRK	BAC24030	IFSFLLVFVLLILFHPVLSIYINTLSSTESLTISGNRTLASPGDDFELGFFKTISRSRWYLGIWYKKISQRTYVWVANRDSPLFNAVGTLKISGNNLVILGDSNNSVWSTNHTRGNERSPVVAELLANGNFVIRYSNNNDASGFLWQSFDYPTDTLLPEMKLGYDLKKGMNRFLTSWRNSDDPSSGNIKYQLDTQRGMPEFYLLKEGSRAHRSGPWNGVQFYGIPEDQKLSYMAYNFIENSEEVAYTFRMTNNSIYSRLKINSDEYLDRLTWTPTSTAWNLFWSAPVDIRCDVYMACGPDAYCDVSTSPVCNCIQGFKRSDEQQWDLRDPSSGCIRGTPLSCKGDGFTRMKKMKLPETRMAIVDRSIGVKECEKRCLSDCNCTAFANADIRNGGTGCVI…
	S35-SRK	BAC24031	TFSVLLVFVVMFLFHPALSIYINTLSSTESLTISSNRTLVSPGDVFEFGFFKTNSSSRWYLGLWYKKLPYRTYVWIANRDNPLSNSIGTLKISDMNLVLLDHSNKSVWSTNLTRGNERSPVVAELLPNGNFVIRYFNNNDASGFLWQSFDYPTDTLLPEMKLGYDLKKGLNRFLTSWRSSDDPSSGEFSYKLEPRRLPEFYIFIEDIPVHRSGPWNGIRFSGILEDQKLSYMVYNFTENSEEVAYAFRMTNNSIYSRLTLSSEGYFQRLTWTPSSVVWNLFWSSPANVECDLYRVCGPNGYCDMNTSPSCNCIQGFNPRNMQQWDLRDPSSGCIRRTLLSCGGDGFTRMMKVKLPDTTMAIVDRSIGLKECKKRCLGDCNCTAFANADTRNGGTGCVTW…	INTLSSTESLTISSNRTLVSPGDVFEFGFFKTNSSSRWYLGLWYKKLPYRTYVWIANRDNPLSNSIGTLKISDMNLVLLDHSNKSVWSTNLTRGNERSPVVAELLPNGNFVIRYFNNNDASGFLWQSFDYPTDTLLPEMKLGYDLKKGLNRFLTSWRSSDDPSSGEFSYKLEPRRLPEFYIFIEDIPVHRSGPWNGIRFSGILEDQKLSYMVYNFTENSEEVAYAFRMTNNSIYSRLTLSSEGYFQRLTWTPSSVVWNLFWSSPANVECDLYRVCGPNGYCDMNTSPSCNCIQGFNPRNMQQWDLRDPSSGCIRRTLLSCGGDGFTRMMKVKLPDTTMAIVDRSIGLKECKKRCLGDCNCTAFANADTRNGGTGCVTWTGELEDIRNYIRDGQDLYVRL…
	S36-SRK	BAC24032	TLSVLLVFVVMILFHPALSIYINTLSSTESLTISSNRTLVSPGNIFELGFFRTNSRWYLGVWYKELTEITYVWIANRDNPISNSIGILKISGNNLVLLGHSNKSVWSTNLTRENERSPVVAELLANGNFVMRDSSGLLWQSFDYPTDTLLPEMKLGYDLKTGLNRFLISWRSLDDPSNGNFSYSLEKRELPEFYLYKGNFRVHRSGPWNGIAFSGIPEDQKLSYMVYNFIENSDEAAYTFRMTNSSIYSKLTINSEGRFQRLTWTPSSGAWNVFWSSPENPECDLYMICGPYAYCDLNTSPSCNCIQGFNPGDVEQWDLRDWTSGCIRRTRLSCSDDGFTRMKNMKLPETTMAIVDRSIGMKECKKRCLSDCNCTAFANADVRNGGTGCVIWTAQLDDV…	INTLSSTESLTISSNRTLVSPGNIFELGFFRTNSRWYLGVWYKELTEITYVWIANRDNPISNSIGILKISGNNLVLLGHSNKSVWSTNLTRENERSPVVAELLANGNFVMRDSSGLLWQSFDYPTDTLLPEMKLGYDLKTGLNRFLISWRSLDDPSNGNFSYSLEKRELPEFYLYKGNFRVHRSGPWNGIAFSGIPEDQKLSYMVYNFIENSDEAAYTFRMTNSSIYSKLTINSEGRFQRLTWTPSSGAWNVFWSSPENPECDLYMICGPYAYCDLNTSPSCNCIQGFNPGDVEQWDLRDWTSGCIRRTRLSCSDDGFTRMKNMKLPETTMAIVDRSIGMKECKKRCLSDCNCTAFANADVRNGGTGCVIWTAQLDDVRNYGADGQDLYVRLAAAD
	S40-SRK	BAE93137	MKRVHNIYHHSYTFSFLLVFLVLILFHPALSIYVNTMSSSESLTISSNRTVVSPGGVFELGFFTPLGRSRWYLGIWYKEVPRKTYAWVANRDNPLSNSIGTLKVSGNNLVLQGQSNNTVWSTNITRGNARSPVIAELLPNGNFVMRYSNNKDPSGFLWQSFDFPTDTLLPEMKLGYDLKTGRNRFLTSWKGSDDPSSGNFVYKLDIRRGLPEFILINTFLNQRVETQRSGPWNGIEFSGIPEVQGLNYMVYNYTENSEEIAYSFQMTNQSIYSRLTVSEFTLDRFTWIPPSWGWSLFWTLPTDVCDPLYLCGSYSYCDLITSPNCNCISGFVPKNPQQWDLRDGTQGCVRRTRLSCSEDEFLRLNNMNLPDTKTATVDRTIDVKKCEERCLSDCNCTSF…	VNTMSSSESLTISSNRTVVSPGGVFELGFFTPLGRSRWYLGIWYKEVPRKTYAWVANRDNPLSNSIGTLKVSGNNLVLQGQSNNTVWSTNITRGNARSPVIAELLPNGNFVMRYSNNKDPSGFLWQSFDFPTDTLLPEMKLGYDLKTGRNRFLTSWKGSDDPSSGNFVYKLDIRRGLPEFILINTFLNQRVETQRSGPWNGIEFSGIPEVQGLNYMVYNYTENSEEIAYSFQMTNQSIYSRLTVSEFTLDRFTWIPPSWGWSLFWTLPTDVCDPLYLCGSYSYCDLITSPNCNCISGFVPKNPQQWDLRDGTQGCVRRTRLSCSEDEFLRLNNMNLPDTKTATVDRTIDVKKCEERCLSDCNCTSFAIADVRNGGLGCVFWTGELVAIRKFAVGGQDLY…
	S41-SRK	BAC24034	TFSFLLVFVVMILFHPALSIYINTLSSTESLKISSNRTLVSPGSIFELGFFRTNSRWYLGIWYKKLPYRTYVWVANRDNPLSNSTGTLKISGNNLVILGHSNKSVWSANLTRGSERSTVVAELLANGNFVMRDSNKNDAILWQSFDFPTDTLLPEMKLGYDLKTGLNRFLTSWRSSDDPSSGNFSYKLENQRLPEFYLSSHGIFRLHRSGPWNGIGFSGIPEDEKLSYMVYNFTENSEEVAYTFRMTNNSIYSRLTLSSKGDFQRLTWDPSLEIWNMFWSSPVDPQCDSYIMCGAYAYCDVNTSPVCNCIQGFNPRNIQRWDQRVWAGGCVRRTQLSCNGDGFTRMKNMKLPETTMAIVDRSVGVKECEKRCLSDCNCTAFANADIRNGGTGCVIWTGQ…	INTLSSTESLKISSNRTLVSPGSIFELGFFRTNSRWYLGIWYKKLPYRTYVWVANRDNPLSNSTGTLKISGNNLVILGHSNKSVWSANLTRGSERSTVVAELLANGNFVMRDSNKNDAILWQSFDFPTDTLLPEMKLGYDLKTGLNRFLTSWRSSDDPSSGNFSYKLENQRLPEFYLSSHGIFRLHRSGPWNGIGFSGIPEDEKLSYMVYNFTENSEEVAYTFRMTNNSIYSRLTLSSKGDFQRLTWDPSLEIWNMFWSSPVDPQCDSYIMCGAYAYCDVNTSPVCNCIQGFNPRNIQRWDQRVWAGGCVRRTQLSCNGDGFTRMKNMKLPETTMAIVDRSVGVKECEKRCLSDCNCTAFANADIRNGGTGCVIWTGQLDDMRNYAIGATDGQDLYVRL…
	S44-SRK	BAE93138	MKRVKNIYHHYTFSFLLVFLVLILFHPALSIYVNTMSSSESLTISSNRTLVSPGGVFELGFFKPLGRSRWYLGIWYIKVPLKTYAWVANRDNPLSSSIGTLKISGNNLVLLGQSNNTVWSTNLTRGNARSPVIAELLPNGNFVIRHSNNKDSSGFLWQSFDFPTDTLLPEMKLGYDLKTGRNRFLTSWKGSDDPSRGNFVYKLDIRRGLPEFILINQFLNQRVETQRSGPWNGMEFSGIPEVQGLNYMVYNYTENSEEISYSFHMTNQSIYSRLTVSEFTFDRLTWIPPSRDWSLFWTLPTDVCDPLYLCGSYSYCDLITSPNCNCIRGFVPKNPQQWDLRDGTQGCVRRTQMSCGRDGFLRLNNMNLPDTKTATVDRTMDVKKCEERCLSDCNCTSFA…	VNTMSSSESLTISSNRTLVSPGGVFELGFFKPLGRSRWYLGIWYIKVPLKTYAWVANRDNPLSSSIGTLKISGNNLVLLGQSNNTVWSTNLTRGNARSPVIAELLPNGNFVIRHSNNKDSSGFLWQSFDFPTDTLLPEMKLGYDLKTGRNRFLTSWKGSDDPSRGNFVYKLDIRRGLPEFILINQFLNQRVETQRSGPWNGMEFSGIPEVQGLNYMVYNYTENSEEISYSFHMTNQSIYSRLTVSEFTFDRLTWIPPSRDWSLFWTLPTDVCDPLYLCGSYSYCDLITSPNCNCIRGFVPKNPQQWDLRDGTQGCVRRTQMSCGRDGFLRLNNMNLPDTKTATVDRTMDVKKCEERCLSDCNCTSFAAADVKNGGIGCVFWTGELVAIRKFAVGGQDLY…
	S45-SRK	BAA34911	MKGVRNIYHHSYTLSFLLVFLVMILFRPAFSINTLSPTESLTISSNRTLVSPGDVFELGFFRTNSRWYLGMWYKKVSERTYVWVANRDNPISNSIGSLKILGNNLVLRGNSNKSVWSTNITRRNERSLVLAELLGNGNFVMRDSNNKDASEYLWQSFDYPTDTLLPEMKLGFQPKTGLNRFLTSWRSSDDPSSGDFSYKLEAQRLPEFYLWNKELFRVHRSGPWNGIRFSGIPEDQKLSYMVYNFTENSEEVAYTFLLTNSSIYSRLIVSSEGYIERQTWNPTLGMWNVFWSFPLDSQCESYRMCGPYSYCDVNTSPVCNCIQGFNPSNVEQWDLRSWSGGCIRRTRVSCSGDGFTRMKNMKLPETTMATVDRSIGVKECEKKCLSDCNCTAFANADIR…	INTLSPTESLTISSNRTLVSPGDVFELGFFRTNSRWYLGMWYKKVSERTYVWVANRDNPISNSIGSLKILGNNLVLRGNSNKSVWSTNITRRNERSLVLAELLGNGNFVMRDSNNKDASEYLWQSFDYPTDTLLPEMKLGFQPKTGLNRFLTSWRSSDDPSSGDFSYKLEAQRLPEFYLWNKELFRVHRSGPWNGIRFSGIPEDQKLSYMVYNFTENSEEVAYTFLLTNSSIYSRLIVSSEGYIERQTWNPTLGMWNVFWSFPLDSQCESYRMCGPYSYCDVNTSPVCNCIQGFNPSNVEQWDLRSWSGGCIRRTRVSCSGDGFTRMKNMKLPETTMATVDRSIGVKECEKKCLSDCNCTAFANADIRNGGTGCVIWTGRLDDMRNYVADHGQDLYVRL…
	S46-SRK	BAA34231	MKGVRNIYHHSYTSFLLVFVVMILFRPTLSIYFNTLSSTESLTISNSRTLVSPGDVFELGFFKTTSSSRWYLGIWYKKLPGRTYVWVANRDNPLSNSIGTLKISNMNLVILDHSNKSVWSTNHTRGNERSLVVAELLANGNFLMRDSNSNDAYGFLWQSFDYPTDTLLPEMKLGYDLKIGLNRSLTSWRSPDDPSSGYFSYKLEGSRRLPEFYLMQGDVREHRSGPWNGIQFIGIPEDQKSSYMMYNFTDNSEEVAYTFVMTNNGIYSRLKLSSDGYLERLTWAPSSGAWNVFWSSPNHQCDMYRMCGTYSYCDVNTSPSCNCIPGFNPKNRQQWDLRIPISGCKRRTRLSCNGDGFTRMKNMKLPDTTMAIVDRSMGVKECEKRCLSDCNCTAFANAD…	FNTLSSTESLTISNSRTLVSPGDVFELGFFKTTSSSRWYLGIWYKKLPGRTYVWVANRDNPLSNSIGTLKISNMNLVILDHSNKSVWSTNHTRGNERSLVVAELLANGNFLMRDSNSNDAYGFLWQSFDYPTDTLLPEMKLGYDLKIGLNRSLTSWRSPDDPSSGYFSYKLEGSRRLPEFYLMQGDVREHRSGPWNGIQFIGIPEDQKSSYMMYNFTDNSEEVAYTFVMTNNGIYSRLKLSSDGYLERLTWAPSSGAWNVFWSSPNHQCDMYRMCGTYSYCDVNTSPSCNCIPGFNPKNRQQWDLRIPISGCKRRTRLSCNGDGFTRMKNMKLPDTTMAIVDRSMGVKECEKRCLSDCNCTAFANADIRNGGTGCVIWTGELEDMRNYAEGGQELYVRL…
	S47-SRK	BAB79443	MQGVRYIYHHSYTFLLVFVVMILFHPALSIYINTLSSTESLTISNNRTLVSPGDVFELGFFKTTSSSRWYLGIWYKQLPEKTYVWVANRDNPLPNSIGTLKISNMNLVLLDHSNKSVWSTNLTRRNERTPVMAELLANGNFVMRDSNNNDASEFLWQSFDYPTDTLLPEMKLGYDLKTGLNRFLISWRSSDDPSSGDYSYKLEPRRLPEFYLLQGDVREHRSGPWNGIRFSGILEDQKLSYMEYNFTETSEEVAYTFRMTNNSFYSRLTLSSTGYFERLTWAPSSVIWNVFWSSPANPQCDMYRMCGPYSYCDVNTSPSCNCIQGFDPRNLQQWALRISLRGCKRRTLLSCNGDGFTRMKNMKLPETTMAIVDRSIGEKECKKRCLTDCNCTAFANADI…	INTLSSTESLTISNNRTLVSPGDVFELGFFKTTSSSRWYLGIWYKQLPEKTYVWVANRDNPLPNSIGTLKISNMNLVLLDHSNKSVWSTNLTRRNERTPVMAELLANGNFVMRDSNNNDASEFLWQSFDYPTDTLLPEMKLGYDLKTGLNRFLISWRSSDDPSSGDYSYKLEPRRLPEFYLLQGDVREHRSGPWNGIRFSGILEDQKLSYMEYNFTETSEEVAYTFRMTNNSFYSRLTLSSTGYFERLTWAPSSVIWNVFWSSPANPQCDMYRMCGPYSYCDVNTSPSCNCIQGFDPRNLQQWALRISLRGCKRRTLLSCNGDGFTRMKNMKLPETTMAIVDRSIGEKECKKRCLTDCNCTAFANADIRNGGTGCVIWTGNLADMRNYVADGQDLYVRL…
	S52-SRK	BAC24037	TSFLLVYVVMILFHPALAIYINTLSATESLTISSNRTLVSPGNVFELGFFITNSSSRWYLGIWYKKLTDRTYVWVANRDNPLSSSTGTLKISGNNLVIFGHSNKSVWSTNLTIGNERSPVVAELLANGNFVMRDPNNNEASGFLWQSFDYPTDTLLPEMKLGYDLKTGLNRFLISWRSSDDPSSGEITYKLEPRRFPEFYIFSDDFRVHRIGPWNGIGFIGIPEDQNSTYIVYNFTENSEEVAYSFRMTNNSIYSRLIITSEGYFQRLMWTPSTEIWQVFWSSPMSLQCDPYRICGPYAYCDESTSPMCICIQGFDPKNRQQWDLRSHASGCIRRTRLRCSGDGFTRMKNMKLPDTTTAIVDRSIGVKECEKRCLSDCNCTAFANADIRNGGTGCVIWT…	INTLSATESLTISSNRTLVSPGNVFELGFFITNSSSRWYLGIWYKKLTDRTYVWVANRDNPLSSSTGTLKISGNNLVIFGHSNKSVWSTNLTIGNERSPVVAELLANGNFVMRDPNNNEASGFLWQSFDYPTDTLLPEMKLGYDLKTGLNRFLISWRSSDDPSSGEITYKLEPRRFPEFYIFSDDFRVHRIGPWNGIGFIGIPEDQNSTYIVYNFTENSEEVAYSFRMTNNSIYSRLIITSEGYFQRLMWTPSTEIWQVFWSSPMSLQCDPYRICGPYAYCDESTSPMCICIQGFDPKNRQQWDLRSHASGCIRRTRLRCSGDGFTRMKNMKLPDTTTAIVDRSIGVKECEKRCLSDCNCTAFANADIRNGGTGCVIWTGELEDIRTYVADGQDLYVRL…
	S53-SRK	BAF91394	TFLLVFVVMILFLPALSIYINTLSSTESLTISSNRTLVSPGDVFELGFFRTNSRWYLGMWYKKLPYRTYVWVANRDNPLSNSIGTLKISGNNLVILGHSNKSVWSTNLTRGSERSTVVAELLANGNFVIRYSNNNDASGFLWQSFDFPTDTLLPDMKLGYDLKKGFNRFLISWRSSDDPSSGNYSYKLETRRLPEFYLSSGVFRLHRSGPWNGIQISGIPEDQNLHYMVYNFIENSEEVAYTFRMTNNSIYSRLTLGFSGDFQRLTWNPSIGIWILFWSSPVDPQCDTYVMCGPNAYCDVNTSPVCNCIQGFNPWNVQLWDQRVWAGGCIRRTQLSCSGDGFTRMKKMKLPETTMAIVDRRIGVKECEKRCLSNCKCTAFANADIRNGGTGCVIWTEQL…	INTLSSTESLTISSNRTLVSPGDVFELGFFRTNSRWYLGMWYKKLPYRTYVWVANRDNPLSNSIGTLKISGNNLVILGHSNKSVWSTNLTRGSERSTVVAELLANGNFVIRYSNNNDASGFLWQSFDFPTDTLLPDMKLGYDLKKGFNRFLISWRSSDDPSSGNYSYKLETRRLPEFYLSSGVFRLHRSGPWNGIQISGIPEDQNLHYMVYNFIENSEEVAYTFRMTNNSIYSRLTLGFSGDFQRLTWNPSIGIWILFWSSPVDPQCDTYVMCGPNAYCDVNTSPVCNCIQGFNPWNVQLWDQRVWAGGCIRRTQLSCSGDGFTRMKKMKLPETTMAIVDRRIGVKECEKRCLSNCKCTAFANADIRNGGTGCVIWTEQLDDMRNYGTGATDGQDLYVR…
	S54-SRK	BAF91382	MKGVQNSYTFCFLLVFVVLILVHPALSIYFNILSSTESLTISGNRTLVSPGDVFELGFFRTTSSSRWYLGIWYKKVYFRTYVWVANRDNPLSRSIGTLRISNMNLVLLDHSNKSVWSTNLTRGNERSPVVAELLANGNFVMRDSNNNDASGFLWQSFDFPTDTLLPEMKLGYDLKTGLNRFLTAWRNSDDPSSGDYSYKLENRELPEFYLLKSGFQVHRSGPWNGVRFSGIPENQKLSYMVYNFTENSEEVAYTFRMTNNSFYSRLKVSSDGYLQRLTLIPISIAWNLFWSSPVDIRCDMFRVCGPYAYCDGNTSPLCNCIQGFDPWNLQQWDIGEPAGGCVRRTLLSCSDDGFTKMKKMKLPDTRLAIVDRSIGLKECEKRCLSDCNCTAFANADIRN…	FNILSSTESLTISGNRTLVSPGDVFELGFFRTTSSSRWYLGIWYKKVYFRTYVWVANRDNPLSRSIGTLRISNMNLVLLDHSNKSVWSTNLTRGNERSPVVAELLANGNFVMRDSNNNDASGFLWQSFDFPTDTLLPEMKLGYDLKTGLNRFLTAWRNSDDPSSGDYSYKLENRELPEFYLLKSGFQVHRSGPWNGVRFSGIPENQKLSYMVYNFTENSEEVAYTFRMTNNSFYSRLKVSSDGYLQRLTLIPISIAWNLFWSSPVDIRCDMFRVCGPYAYCDGNTSPLCNCIQGFDPWNLQQWDIGEPAGGCVRRTLLSCSDDGFTKMKKMKLPDTRLAIVDRSIGLKECEKRCLSDCNCTAFANADIRNGGTGCVIWTGHLQDIRTYYDEGQDLYVRL…
	S55-SRK	BAF91395	TFSFLLVFVVLILFHPALSIYFNILSSTETLSISGNRTLVSPGDVFELGFFTTTSSSRWYLGIWYKKVYFKTYVWVANRDSPLSNATGTLKITGNNLVLLDFSNKSVWSTNLTRGNERSPVVAELLANGNFVMRDSNNNDASEFLWQSFDFPTDTLLPEMKLGYDLKTGHKRFLTSWRNSDDPSSGEISYILDTQRGMPEFFLLENGFIIHRSGPWNGVQFSGIPDDQKLSYMVYNFIENSEEVAYTFRVTNNSIYSRLKISSEGFLERLTLTPMSSAWNLLWSSPVDIRCDVYIVCGPYSYCDGNTSPLCNCIQGFMPFIVQRWDMGDGAGGCIRRTPLSCSGDGFTRMKNMKLPDTTMAIVDRRIGVKECKKRCLSNCNCTAFANADIRNGGTGCVI…	FNILSSTETLSISGNRTLVSPGDVFELGFFTTTSSSRWYLGIWYKKVYFKTYVWVANRDSPLSNATGTLKITGNNLVLLDFSNKSVWSTNLTRGNERSPVVAELLANGNFVMRDSNNNDASEFLWQSFDFPTDTLLPEMKLGYDLKTGHKRFLTSWRNSDDPSSGEISYILDTQRGMPEFFLLENGFIIHRSGPWNGVQFSGIPDDQKLSYMVYNFIENSEEVAYTFRVTNNSIYSRLKISSEGFLERLTLTPMSSAWNLLWSSPVDIRCDVYIVCGPYSYCDGNTSPLCNCIQGFMPFIVQRWDMGDGAGGCIRRTPLSCSGDGFTRMKNMKLPDTTMAIVDRRIGVKECKKRCLSNCNCTAFANADIRNGGTGCVIWTGALQDIRTYYDDGQDLYVR…
	S56-SRK	BAF91396	IFSFLLVFVVMILFHPALSIYFNTLSSTESLTISTNRTLVSPGDVFELGFFRTNSRWYLGMWYKKLPYRTYVWVANRDNPLSSSIGTLKISGNNLVILGHSNKSVWSTNLTRGSERSTVVAELLGNGNFVMRDTNNNDASEFLWQSFDYPTDTLLPEMKLGYNLKKGLNRLLISWRSSDDPSSGDYSYKLEPRRLPEFYLLKRGVFRVQRSGPWNGIQFNGIPEDQTLSYMVYNFTENSEEVAYTFLMTNNSFYSRLTINFEGDFQRLTWAPSSIVWTVFWSSPVNPQCDIYRMCGPYSYCDVNTSPVCNCIQGFNRKNRQQWDVRIFLSGCIRRTRLSCNGDGFTRMKNMKLPETTMAIVDRSIGLKECEKRCLSDCNCTAFANADIRNGGTGCVIWI…	FNTLSSTESLTISTNRTLVSPGDVFELGFFRTNSRWYLGMWYKKLPYRTYVWVANRDNPLSSSIGTLKISGNNLVILGHSNKSVWSTNLTRGSERSTVVAELLGNGNFVMRDTNNNDASEFLWQSFDYPTDTLLPEMKLGYNLKKGLNRLLISWRSSDDPSSGDYSYKLEPRRLPEFYLLKRGVFRVQRSGPWNGIQFNGIPEDQTLSYMVYNFTENSEEVAYTFLMTNNSFYSRLTINFEGDFQRLTWAPSSIVWTVFWSSPVNPQCDIYRMCGPYSYCDVNTSPVCNCIQGFNRKNRQQWDVRIFLSGCIRRTRLSCNGDGFTRMKNMKLPETTMAIVDRSIGLKECEKRCLSDCNCTAFANADIRNGGTGCVIWIGRLDDMRNYVPDHGQDLYVRL…
	S60-SRK	BAC76056	MKGVHNIYHHSYTFSFLLVFLALILFHPALSTYVNTMSSSESLTISSNRTLVSPGGVFELGFFKPSGRSRWYLGIWYKKVSQKTYAWVANRDNPLSNSIGTLKISGNNLVLLGQSNNTVWSTNLTRENVRSPVIAELLPNGNFVMRYSNNKDSSGFLWQSFDFPTDTLLPEMKLGYDFKTGRNRFLTSWRSYDDPSSGKFTYELDIQTGLPEFILINRFLNQRVVMQRSGPWNGIEFSGIPEVQGLNYMVYNYTENSEEIAYSFQMTNQSIYSRLTVSDYTLNRFTRIPPSWGWSLFWSLPTDVCDSLYFCGSYSYCDLNTSPYCNCIRGFVPKNRQRWDLRDGSHGCVRTTQMSCSGDGFLRLNNMNLPDTKTASVDRTIDVKKCEEKCLSDCNCTSF…	VNTMSSSESLTISSNRTLVSPGGVFELGFFKPSGRSRWYLGIWYKKVSQKTYAWVANRDNPLSNSIGTLKISGNNLVLLGQSNNTVWSTNLTRENVRSPVIAELLPNGNFVMRYSNNKDSSGFLWQSFDFPTDTLLPEMKLGYDFKTGRNRFLTSWRSYDDPSSGKFTYELDIQTGLPEFILINRFLNQRVVMQRSGPWNGIEFSGIPEVQGLNYMVYNYTENSEEIAYSFQMTNQSIYSRLTVSDYTLNRFTRIPPSWGWSLFWSLPTDVCDSLYFCGSYSYCDLNTSPYCNCIRGFVPKNRQRWDLRDGSHGCVRTTQMSCSGDGFLRLNNMNLPDTKTASVDRTIDVKKCEEKCLSDCNCTSFATADVRNGGLGCVFWTGDLVEIRKQAVVGQDLY…
	S61-SRK	BAF91397	TLSFLLVFFVLILFRLAFSINTLSSTESLTISSSRTLVSPGNVFELGFFKTTSSSRWYLGMWYKKFPYRTYVWVANRDNPLSNDIGTLKTSGNNLVLLDHSNKSVWSTNVTRGNERSPVVAELLANGNFVMRDSNNNNASQFLWQSFDYPTDTLLPEMKLGYDLKTGLNRFLTSWRSSDDPSSGDYSYKLELRRLPEFYLWKGSIRTHRSGPWSGIQFSGIPEDQRLSNMVYNFTENSEEVAYTFQMTNNSFYSTLTISSTGYFERLTWAPSSVVWNVFWSSPNHQCDMYRICGPYTYCDVNTSPSCNCIQGFRPKNRQQWDLRIPISGCKRRTRLSCNGDGFTRMKNMKLPDTTMAIVDRSIVLKECKKRCLGDCNCTAFANADIRNGGTGCVIWIGE…	INTLSSTESLTISSSRTLVSPGNVFELGFFKTTSSSRWYLGMWYKKFPYRTYVWVANRDNPLSNDIGTLKTSGNNLVLLDHSNKSVWSTNVTRGNERSPVVAELLANGNFVMRDSNNNNASQFLWQSFDYPTDTLLPEMKLGYDLKTGLNRFLTSWRSSDDPSSGDYSYKLELRRLPEFYLWKGSIRTHRSGPWSGIQFSGIPEDQRLSNMVYNFTENSEEVAYTFQMTNNSFYSTLTISSTGYFERLTWAPSSVVWNVFWSSPNHQCDMYRICGPYTYCDVNTSPSCNCIQGFRPKNRQQWDLRIPISGCKRRTRLSCNGDGFTRMKNMKLPDTTMAIVDRSIVLKECKKRCLGDCNCTAFANADIRNGGTGCVIWIGELADIRNYADGGQDLYVRLA…
	S99-SRK	BAC24038	TFSFLLVFVVSIIFHPALSIYINTLSSTESLTISGNRTLVSPGDDFELGFFKTTSRSRWYLGIWYKKISERTYVWVANRDSPLSNAVGTLKISGNNLVLLDHFNKSVWSTNLTRGNERSPVVAELLANGNFVIRYFSNNDASGFLWQSFDYPTDTLLPEMKLGYDIKTGLNRFLTSWRSYDDPSSGEIVYKLDTQRGMPEFFLLKNDFPAHRSGPWNGIGFSGLPEDHKLGYMAYNFIENSEEVAYSFRMTNNSIYSRLEINSDGDLERLIWTPTSWEWSLFWSSPVDLQCDVYKTCGPYAYCDLNTSPLCNCIQGFTPSNVQQWDLRNPSAGCIRRTRLSCRGDGFTRMKNMKLPETTIATVDRNIGLKECKKMCLSDCNCTAFANADIRNGGTGCVI…	INTLSSTESLTISGNRTLVSPGDDFELGFFKTTSRSRWYLGIWYKKISERTYVWVANRDSPLSNAVGTLKISGNNLVLLDHFNKSVWSTNLTRGNERSPVVAELLANGNFVIRYFSNNDASGFLWQSFDYPTDTLLPEMKLGYDIKTGLNRFLTSWRSYDDPSSGEIVYKLDTQRGMPEFFLLKNDFPAHRSGPWNGIGFSGLPEDHKLGYMAYNFIENSEEVAYSFRMTNNSIYSRLEINSDGDLERLIWTPTSWEWSLFWSSPVDLQCDVYKTCGPYAYCDLNTSPLCNCIQGFTPSNVQQWDLRNPSAGCIRRTRLSCRGDGFTRMKNMKLPETTIATVDRNIGLKECKKMCLSDCNCTAFANADIRNGGTGCVIWTGRLHDIRNYAADGQDLYVR…
	Sb-SRK	ADQ37349	MRVVVPNCHHFYIFFVVLILIRSVFSSYVHTLSSTESLTISSKQTIVSPGEVFELGFFNPAATSRDGDRWYLGIWFKTNLERTYVWVANRDNPLYNSTGTLKISDTNLVLLDQFDTLVWSTNLTGVLRSPVVAELLSNGNLVLKDSKTNDKDGILWQSFDYPTDTLLPQMKMGWDVKKGLNRFLRSWKSQYDPSSGDFSYKLETRGFPEFFLLWRNSRVFRSGPWDGLRFSGIPEMQQWEYMVSNFTENREEVAYTFQITNHNIYSRFTMSSTGALKRFRWISSSEEWNQLWNKPNDHCDMYKRCGPYSYCDMNTSPICNCIGGFKPRNLHEWTLRNGSIGCVRKTRLNCGGDGFLCLRKMKLPDSSAAIVDRTIDLGECKKRCLNDCNCTAYASTDIQ…
	S8-SP11	AAF17505	MKSAVYALLCFIFIVSGHIQELEANLMKRCTRGFRKLGKCTTLEEEKCKTLYPRGQCTCSDSKMNTHSCDCKSC	KRCTRGFRKLGKCTTLEEEKCKTLYPRGQCTCSDSKMNTHSCDCKSC
	S9-SP11	BAA85458	MKSAIYALLCFIFIVSSHVQEVEANLRKTCVHRLNSGGSCGKSGQHDCEAFYTNKTNQKAFYCNCTSPFRTRYCDCAIKCKVR	RKTCVHRLNSGGSCGKSGQHDCEAFYTNKTNQKAFYCNCTSPFRTRYCDCAIKCKVR
	S12-SP11	BAA21132	MKSAIYALLCFIFIILSRSQELTEVGADKQQCKKNFPGHCETSERCENTYKRLNKKVFDCHCQPFGRRRLCTCKC
	S21-SP11	BAA96392	IFIIISSHFQVEAKPCADTFPGDCRNGGNERCAISFSSYKKRKASNCQCRPYDDKKRLCDCEC
	S29-SP11	BAB86356	MRYATSIFFFLTKIHYLCFIFLTLTSVQALDVGARNCPEGIAKSNDVIGTCLNTKSRDCQKHFGPNVTNCLCYPFSTHNRVRITCYCCKVKS	ARNCPEGIAKSNDVIGTCLNTKSRDCQKHFGPNVTNCLCYPFSTHNRVRITCYCCKVKS
	S32-SP11	BAA96394	IFVVSIHVQGVEANPTKLCRGSVTSRGVCDNSGVQRCVTEFSKKIDKDPRLCSCICRHHEGRRFCPCECKC	TKLCRGSVTSRGVCDNSGVQRCVTEFSKKIDKDPRLCSCICRHHEGRRFCPCECKC
	S34-SP11	BAA96396	LFIISSHSQEVEANKVKQCFRRRTLTGECVSPGGDKRCEDYFKNKLNEKTAFNCNCVGSRKHALCTCEIRRNPCPY
	S36-SP11	BAA96397	LFVVSSHVQGVEANLTKLCPGNVTSRGVCGNSGVQSCVTAISKKLHKDRRLCSCLCKIHEGHRFCPCVCKC	TKLCPGNVTSRGVCGNSGVQSCVTAISKKLHKDRRLCSCLCKIHEGHRFCPCVCKC
	S40-SP11	BAB86357	MRYATYIYFFLTKIHYLCFIFLTLTYVQALDVGAWKCPGAVAKADNITGTCVNSVSEDCQRFVGPNVNNCLCLKFSEHNRGRITCYCCKVKS	AWKCPGAVAKADNITGTCVNSVSEDCQRFVGPNVNNCLCLKFSEHNRGRITCYCCKVKS
	S44-SP11	BAB86358	MRYATSIYNFLTKIHYLCFIFWTLTYVQALDVGPLECPKGVAESGPIRGSCLNSTSAACKTHFRQNVTNCLCINFSNHNRGRINCYCCKVKS	PLECPKGVAESGPIRGSCLNSTSAACKTHFRQNVTNCLCINFSNHNRGRINCYCCKVKS
	S45-SP11	BAA96401	MFIISSHGQGVEADLRKECNGYTQLSGPCPNLGGEACANRYEIRAKKRPRSCNCNDVDEVGFCHCSLCK
	S46-SP11	BAA96402	MNSAIYALLCFIFIVSGHIQEVEANPMKQCKIGYRMPGNCAELAQTCENFCSRGKEKKPSHWKCTNGPKNTYSCDCK	RKTCVHRLNSGGSCGKSGQHDCEAFYTNKTNQKAFYCNCTSPFRTRYCDCAIKCKVR
	S47-SP11	BAA96403	MKSAVYNALLCFIFIVSGHIQEVEANLMNPCDDIFGMEGQCGGPKTCEKLYSKGMDKRPPRCECTNSGKNTYSCVCKLC	MNPCDDIFGMEGQCGGPKTCEKLYSKGMDKRPPRCECTNSGKNTYSCVCKLC
	S52-SP11	BAA92247	MKSVLYALLCFIFIVSSHAQDVEANLMNRCTRELPFPGKCGSSEDGGCIKLYSSEKKLHPSRCECEPRYKARFCRCKIC
	S60-SP11	BAB86353	MRYATSIYTFLTNIHYLCFIFLILTYVQALDVGAWKCPEGIVYPSPISGRCINSRSTECKKHYEVEGQNVTNCRCDTYSMQNPARITCYCCKVKS	AWKCPEGIVYPSPISGRCINSRSTECKKHYEVEGQNVTNCRCDTYSMQNPARITCYCCKVKS
	S61-SP11	BAI53095	IQEVEANLMMPCGSIMVGNCRNLGAKECEKLNSPGKRKRPSHCKCTNTQRGTYSCDCKLC	MMPCGSIMVGNCRNLGAKECEKLNSPGKRKRPSHCKCTNTQRGTYSCDCKLC
	Sb-SP11	Q9AVE2	MRNATFFIVFYVFISLVLSNVQDVTAQKNKCMRSEMFPTGPCGNNGEETCKKDFKNIYRTPIQCKCLDKYDFARLCDCRFC
	Additional references are listed in Supplementary References1-6
